**Running title:** CO<sub>2</sub> regulation mechanisms of SLAC1 channel

**Reconstitution of CO<sub>2</sub> regulation of SLAC1 anion channel and function of CO<sub>2</sub>-permeable PIP2;1 aquaporin as carbonic anhydrase 4 interactor**

Cun Wang<sup>1#</sup>, Honghong Hu<sup>1,2##\*</sup>, Xue Qin<sup>3</sup>, Brian Zeise<sup>3</sup>, Danyun Xu<sup>2</sup>, Wouter-Jan Rappel<sup>4</sup>, Walter F. Boron<sup>3</sup>, Julian I. Schroeder<sup>1\*</sup>

<sup>1</sup>Division of Biological Sciences, Section of Cell and Developmental Biology, University of California, San Diego, La Jolla, CA 92093-0116, USA.

<sup>2</sup>College of Life Science and Technology, Huazhong Agricultural University, No.1, Shizishan Street, Hongshan District Wuhan, 430070, China.

<sup>3</sup>Department of Physiology and Biophysics, Case Western Reserve University, OH 44106, USA.

<sup>4</sup>Physics Department, University of California, San Diego, La Jolla, CA 92093, USA.

---

# These authors contributed equally to this work.

\* Address correspondence to [jis Schroeder@ucsd.edu](mailto:jis Schroeder@ucsd.edu) and [huhh@mail.hzau.edu.cn](mailto:huhh@mail.hzau.edu.cn).

## ABSTRACT

Daily dark periods cause an increase in the leaf CO<sub>2</sub> concentration (*C<sub>i</sub>*) and the continuing atmospheric [CO<sub>2</sub>] rise also increases *C<sub>i</sub>*. Elevated *C<sub>i</sub>* causes closing of stomatal pores thus regulating gas exchange of plants. The molecular signaling mechanisms leading to CO<sub>2</sub>-induced stomatal closure are only partially understood. Here we demonstrate that high intracellular CO<sub>2</sub>/HCO<sub>3</sub><sup>-</sup> enhances currents mediated by the guard cell S-type anion channel SLAC1 when co-expressing either of the protein kinases OST1, CPK6 or CPK23 in *Xenopus* oocytes. Split-ubiquitin screening identified the PIP2;1 aquaporin as an interactor of the βCA4 carbonic anhydrase, which was confirmed in split luciferase, bimolecular fluorescence complementation and co-immunoprecipitation experiments. PIP2;1 exhibited CO<sub>2</sub> permeability. Co-expression of βCA4 and PIP2;1 with OST1-SLAC1 or CPK6/23-SLAC1 enabled extracellular CO<sub>2</sub> enhancement of SLAC1 anion channel activity. An inactive PIP2;1 point mutation was identified which abrogated water and CO<sub>2</sub> permeability and extracellular CO<sub>2</sub> regulation of SLAC1 activity in *Xenopus* oocytes. These findings identify the CO<sub>2</sub>-permeable PIP2;1 aquaporin as key interactor of carbonic anhydrases, show functional reconstitution of extracellular CO<sub>2</sub> signaling to ion channel regulation and implicate SLAC1 as a bicarbonate-responsive protein in CO<sub>2</sub> regulation of S-type anion channels.

## INTRODUCTION

Plant stomata, which are formed by pairs of guard cells in the epidermis of aerial tissues, control gas exchange and transpiration. Stomatal movements are regulated by several signals, including the phytohormone abscisic acid (ABA),

CO<sub>2</sub> (carbon dioxide), humidity, reactive oxygen species (ROS), light and pathogens (Hetherington and Woodward, 2003; Kim et al., 2010; Roelfsema et al., 2012; Murata et al., 2015). Daily respiration during darkness causes a rapid elevation in the CO<sub>2</sub> concentration in the intercellular space in leaves (*C<sub>i</sub>*) to ≥ 600 ppm (Hanstein et al., 2001). Furthermore, the continuing increase in the atmospheric CO<sub>2</sub> concentration also causes an increase in *C<sub>i</sub>*. Increased *C<sub>i</sub>* reduces stomatal apertures and thus affects CO<sub>2</sub> influx into plants, leaf heat stress, plant water use efficiency and yield (LaDeau and Clark, 2001; Medlyn et al., 2001; Hetherington and Woodward, 2003; Ainsworth and Long, 2005; Battisti and Naylor, 2009; Holden, 2009; Frommer, 2010).

Carbonic anhydrases catalyze the reversible reaction of CO<sub>2</sub> + H<sub>2</sub>O ⇌ HCO<sub>3</sub><sup>-</sup> + H<sup>+</sup>. *Arabidopsis* double mutant plants in the β-carbonic anhydrases (*βCA1* and *βCA4*) display slowed stomatal movement responses to CO<sub>2</sub> changes (Hu et al., 2010). Expression of an unrelated mammalian α-CA in *βca1βca4* double-mutant guard cells restores the stomatal CO<sub>2</sub> response, suggesting that CA-mediated CO<sub>2</sub> catalysis to bicarbonate and protons is an important step for transmission of the CO<sub>2</sub> signal (Hu et al., 2010).

*SLAC1* (*SLOW ANION CHANNEL-ASSOCIATED 1*) encodes an S-type anion channel in *Arabidopsis* guard cells (Negi et al., 2008; Vahisalu et al., 2008). A group of protein kinases including OST1 (*OPEN STOMATA 1*), CPKs (*Ca*<sup>2+</sup>-dependent protein kinases) and GHR1 (*GUARD CELL HYDROGEN PEROXIDE-RESISTANT 1*) can phosphorylate and activate SLAC1 anion channels in *Xenopus* oocytes (Geiger et al., 2009; Lee et al., 2009; Geiger et al., 2010; Brandt et al., 2012; Hua et al., 2012). S-type anion channels are permeable to Cl<sup>-</sup> and NO<sub>3</sub><sup>-</sup>, but not to HCO<sub>3</sub><sup>-</sup> (Schmidt and Schroeder, 1994; Geiger et al., 2009; Xue et al., 2011). Intracellular bicarbonate generated by carbonic anhydrases acts as a second messenger and activates S-type anion channels in

guard cells (Xue et al., 2011; Tian et al., 2015).

The OST1 protein kinase is required for CO<sub>2</sub>-induced stomatal closing (Xue et al., 2011; Merilo et al., 2013). A recent study reported that RHC1, a MATE-type transporter protein, acts as a bicarbonate sensor (Tian et al., 2015) and also inhibits HIGH LEAF TEMPERATURE 1 (HT1), a protein kinase that negatively regulates CO<sub>2</sub>-induced stomatal closing (Hashimoto et al., 2006). HT1 was found to phosphorylate and inhibit the OST1 protein kinase (Tian et al., 2015). Here, we have pursued investigation of the molecular targets and requirements for intracellular CO<sub>2</sub>/HCO<sub>3</sub><sup>-</sup> enhancement of SLAC1 anion channel activity.

We show that elevated intracellular NaHCO<sub>3</sub> can enhance SLAC1 anion channel currents in both OST1-SLAC1 and CPK6/23-SLAC1 expressing oocytes. We isolate and characterize the PIP2;1 aquaporin as a new  $\beta$ CA4 carbonic anhydrase interactor and as a CO<sub>2</sub>-permeable aquaporin. In addition, we show that extracellular CO<sub>2</sub> enhancement of S-type anion channels can be reconstituted when OST1-SLAC1 or CPK6/23-SLAC1 are co-expressed with the  $\beta$ CA4 carbonic anhydrase and PIP2;1 in *Xenopus* oocytes.

## RESULTS

### **Elevated intracellular NaHCO<sub>3</sub> can enhance SLAC1 anion channel currents in OST1-SLAC1 expressing oocytes.**

Intracellular bicarbonate enhances S-type anion channel currents in wild-type *Arabidopsis* guard cells (Hu et al., 2010; Xue et al., 2011; Tian et al., 2015). To test for minimal requirements by which bicarbonate could regulate the S-type anion channel SLAC1, we expressed SLAC1<sub>yc</sub>, or co-expressed SLAC1<sub>yc</sub> with the OST1<sub>yn</sub> protein kinase in *Xenopus* oocytes. To investigate electrophysiological responses, we injected 11.5 mM NaHCO<sub>3</sub> into oocytes, mimicking high

bicarbonate conditions that activate S-type anion channel currents in guard cells (Hu et al., 2010; Xue et al., 2011). Injection of 11.5 mM NaHCO<sub>3</sub> buffered to pH 7.5 with Mes/Tris corresponds to 10.5 mM free HCO<sub>3</sub><sup>-</sup> and 1 mM free CO<sub>2</sub> (see Methods). Results from over six independent oocyte batches showed that high NaHCO<sub>3</sub> consistently enhanced SLAC1yc/OST1yn-mediated anion channel currents in oocytes (Figure 1;  $p = 0.027$  at -160 mV in SLAC1yc/OST1yn vs SLAC1yc/OST1yn + HCO<sub>3</sub><sup>-</sup>). In contrast, SLAC1yc expression alone or water-injected control oocytes showed no significant NaHCO<sub>3</sub> activation (Figure 1). To determine whether this activation is pH dependent, we also injected 11.5 mM NaHCO<sub>3</sub> buffered to pH 7 and pH 8 into oocytes. The results showed that pH had no effect on the activation of SLAC1 anion channel currents (Supplemental Figure 1). In additional experiments, we injected an iso-osmotic 23 mM sorbitol solution buffered to pH 8. No enhancement of SLAC1-mediated ionic currents was observed, suggesting that a pH change was not the mechanism mediating enhancement of SLAC1-mediated currents. As an additional control for NaHCO<sub>3</sub>, injection of NaCl at the same concentration into oocytes did not enhance SLAC1yc/OST1yn-mediated anion channel currents, but rather showed an average reduction in anion currents (Supplemental Figure 2).

We investigated whether the NaHCO<sub>3</sub><sup>-</sup> induced enhancement of SLAC1yc/OST1yn-mediated anion channel currents was dependent on the NaHCO<sub>3</sub> concentration. A series of final intracellular NaHCO<sub>3</sub> concentrations was microinjected: 0 mM, 1 mM, 5.7 mM and 11.5 mM. Results from over three independent oocyte batch experiments showed that low NaHCO<sub>3</sub> failed to significantly enhance SLAC1yc/OST1yn-mediated anion channel currents, while injection of high NaHCO<sub>3</sub> concentrations (5.7 mM and 11.5 mM) enhanced SLAC1yc/OST1yn-mediated anion channel currents (Figure 2A and 2B), which is in line with required NaHCO<sub>3</sub> concentrations in guard cells (Xue et al., 2011., Tian

et al., 2015). Furthermore, activation by 11.5 mM NaHCO<sub>3</sub> was stronger than 5.7 mM NaHCO<sub>3</sub> (Figure 2A and B;  $p = 0.034$  at -160 mV in 11.5 mM NaHCO<sub>3</sub> vs 5.7 mM NaHCO<sub>3</sub>). Thus high intracellular NaHCO<sub>3</sub> concentrations could enhance SLAC1yc/OST1yn-mediated anion channel currents at similar concentrations as in guard cells (Xue et al., 2011).

### **PIP2;1 aquaporin as a new $\beta$ CA4 carbonic anhydrase interactor and as a CO<sub>2</sub>-permeable aquaporin**

The  $\beta$ CA1 and  $\beta$ CA4 carbonic anhydrases function in CO<sub>2</sub>-induced stomatal closing (Hu et al., 2010; Hu et al., 2015). To characterize the CO<sub>2</sub> signaling mechanisms mediated by carbonic anhydrase proteins, we screened for interactors of these  $\beta$ -carbonic anhydrases by using the yeast two hybrid system with an *Arabidopsis* cDNA library (BD Clontech), using full length  $\beta$ CA4 cDNA as bait. However, no reproducible candidate interactors were isolated. The  $\beta$ CA4 carbonic anhydrase has been reported to be targeted to the plasma membrane in transiently-transformed tobacco cells, and  $\beta$ CA1 was mainly targeted to chloroplasts (Fabre et al., 2007; Hu et al., 2015). To screen for putative plasma membrane interactors of the carbonic anhydrase  $\beta$ CA4, the split-ubiquitin system (SUS) was developed and improved to detect protein-protein interactions (Jones et al., 2014). We used  $\beta$ CA4 as a bait and screened a SUS cDNA library, which was constructed in the pNX33-DEST vector (Grefen et al., 2007). In this screen, reproducible putative  $\beta$ CA4-interacting proteins were isolated, including Nodulin MtN3 (At3g06433), CNGC13 (At3g01010) and the PIP2;1 aquaporin (Figure 3A).

To further investigate putative interactors of  $\beta$ CA4 and assess whether these interactions occur *in vivo*, PIP2;1 aquaporin was chosen for further analyses in the present study. The split YFP combinations of  $\beta$ CA4-YC with PIP2;1-YN were transiently co-expressed in *Nicotiana benthamiana* leaves. Bimolecular

fluorescence (BIFC) (Walter et al., 2004; Bracha-Drori et al., 2004) results showed that  $\beta$ CA4-YC and PIP2;1-YN interacted with each other in the vicinity of the plasma membrane (Figure 3B), supporting the SUS results. Reversible split luciferase complementation assays (Chen et al., 2008) were conducted to further test protein-protein interactions in *Nicotiana benthamiana* leaves and also showed that  $\beta$ CA4 interacts with PIP2;1 using this approach in leaves (Figure 3C). Furthermore, co-immunoprecipitation experiments were performed to test for protein-protein interactions in *Nicotiana benthamiana* leaves.  $\beta$ CA4-YFP co-immunoprecipitated with PIP2;1-HA as detected using HA and GFP antibodies (Figure 3D). In summary, four independent approaches: SUS, BiFC, split luciferase complementation and co-immunoprecipitation showed interactions of  $\beta$ CA4 and PIP2;1 *in vitro* and in plant cells.

The aquaporins NtAQP1 from tobacco, PIP1;2 from *Arabidopsis* and four PIP2 proteins in barley, were identified as CO<sub>2</sub> transporters in plant cells (Uehlein et al., 2003; Uehlein et al., 2008; Uehlein et al., 2012; Mori et al., 2014). We investigated whether PIP2;1 can also mediate CO<sub>2</sub> transport. PIP2;1 was expressed in *Xenopus* oocytes. pH changes in the proximity of the plasma membrane were used as an indicator that reflect the changes in acidification at the membrane surface of *Xenopus* oocytes mediated by CO<sub>2</sub> flux (Musa-Aziz et al., 2009, 2014). The data showed that expression of PIP2;1 resulted in an enhanced change in the surface pH of oocytes, indicating that PIP2;1 enhanced the CO<sub>2</sub> permeability of oocytes over the background CO<sub>2</sub> permeability (Figure 3E and Supplemental Figure 3). Interestingly, when PIP2;1 was co-expressed with  $\beta$ CA4 in *Xenopus* oocytes,  $\Delta$ pH was significantly increased compared to either PIP2;1 or  $\beta$ CA4 expression alone, suggesting enhanced CO<sub>2</sub> transport into oocytes (Figure 3E and Supplemental Figure 3), which is similar to human carbonic anhydrase- enhanced CO<sub>2</sub> fluxes across *Xenopus* oocytes plasma

membranes (Musa-Aziz et al., 2014).

### **Reconstitution of extracellular CO<sub>2</sub> signaling to SLAC1 anion channel regulation**

As  $\beta$ CA4 physically interacts with the PIP2;1 aquaporin (Figure 3A-D) and PIP2;1 shows a CO<sub>2</sub> permeability (Figure 3E), we pursued experiments to investigate whether extracellular CO<sub>2</sub>/HCO<sub>3</sub><sup>-</sup> regulation of anion channels can be reconstituted in *Xenopus* oocytes.

Although injection of NaHCO<sub>3</sub> into oocytes enhanced SLAC1-mediated currents (Figures 1 and 2), increasing extracellular CO<sub>2</sub>/HCO<sub>3</sub><sup>-</sup> by addition of 11.5 mM NaHCO<sub>3</sub> to the bath solution did not enhance SLAC1yc/OST1yn expressing oocyte currents (Figure 4A). When either  $\beta$ CA4 or the PIP2;1 aquaporin alone were co-expressed with SLAC1yc and OST1yn in *Xenopus* oocytes in the presence of high CO<sub>2</sub>/HCO<sub>3</sub><sup>-</sup> in the bath solution, no significant increase in ion currents was observed in three independent batches of oocytes (Figure 4B). We then co-expressed  $\beta$ CA4, PIP2;1 with SLAC1yc and OST1yn in oocytes, and found  $\beta$ CA4 and PIP2;1 did not significantly enhance ion currents in the bath solution without extracellular addition of NaHCO<sub>3</sub> (Figure 4C). In contrast, in more than four independent batches of oocytes in the presence of extracellular NaHCO<sub>3</sub>, co-expression of  $\beta$ CA4, PIP2;1, SLAC1yc and OST1yn in oocytes displayed larger anion channel currents than SLAC1yc/OST1yn co-expressing oocytes (Figure 4D and 4E,  $p = 0.017$  at -160 mV in SLAC1yc/OST1yn vs SLAC1yc/OST1yn+CA4+PIP2;1 ).

### **Functional PIP2;1 is required for the extracellular CO<sub>2</sub> response**

To test the hypothesis that a functional PIP2;1 is required for the extracellular CO<sub>2</sub> response, we attempted to design non-permeable PIP2;1 isoforms. Several



aquaporin structures have been resolved by X-ray crystallography, including human hAQP1, human hAQP5 and spinach aquaporin soPIP2 (Ren et al., 2000; Fujiyoshi et al., 2002; Kukulski et al., 2005; Horsefield et al., 2008; Nyblom et al., 2009). We then aligned hAQP1, hAQP5, SoPIP2 with PIP2;1. Based on this model, we speculated that L81; W85 and F210 might play a role in CO<sub>2</sub> permeability. These three PIP2;1 amino acid residues were mutated to alanine in PIP2;1, and the cRNAs were expressed in *Xenopus* oocytes. In addition, grapevine VvPIP2;5 expressing oocytes have a very low water permeability compared with VvPIP2;1 and SoPIP2;1 (Shelden et al., 2009). Previous sequence alignments of the conserved B loop led to the model that W100 is a large and hydrophobic residue that may block the pore of VvPIP2;5 (Shelden et al., 2009). We therefore mutated the corresponding residue in PIP2;1-G103 to W. The osmotic water permeability (Pf) of PIP2;1-L81A, PIP2;1-W85A and PIP2;1-F210A showed no significant difference compared to the water permeability of wild type PIP2;1 (Figure 5A). Interestingly, the PIP2;1-G103W point mutant isoform exhibited a much weaker water permeability than wild type PIP2;1 in *Xenopus* oocytes (Figure 5A). This supports the model that the PIP2;1-G103 residue is important for PIP2;1-mediated function.

To determine whether the PIP2;1 mutant protein isoforms are expressed and translocated to the plasma membrane of *Xenopus* oocytes, mRNAs of PIP2;1-YFP fusion proteins were expressed in oocytes. Confocal fluorescence microscopy analyses showed that all tested PIP2;1 mutant isoforms, including the non-functional PIP2;1-G103W-YFP fusion protein, were present at the plasma membrane (Figure 5B).

We next co-expressed the four mutant PIP2;1 isoforms with  $\beta$ CA4, SLAC1yc and OST1yn in *Xenopus* oocytes. We found that expression of the mutants PIP2;1-L81A, PIP2;1-W85A and PIP2;1-F210A could still mediate extracellular

CO<sub>2</sub>/HCO<sub>3</sub><sup>-</sup> enhancement of SLAC1yc/OST1yn-mediated anion channel currents in four independent oocyte batches (Figure 6 and Supplemental Figure 4). In contrast the PIP2;1-G103W mutant isoforms did not enable extracellular CO<sub>2</sub>/HCO<sub>3</sub><sup>-</sup>-mediated enhancement SLAC1yc/OST1yn-mediated anion channel currents in three independent oocytes batches (Figure 6 and Supplemental Figure 4).

The PIP2;1-G103W mutation disrupted water permeability but not plasma membrane localization of PIP2;1 in *Xenopus* oocytes (Figure 5B). We investigated whether PIP2;1-G103W affects CO<sub>2</sub> transport in oocytes. Experiments showed that expression of PIP2;1 resulted in an enhanced change in surface pH of oocytes, whereas in the same oocytes batches PIP2;1-G103W did not significantly changed the surface pH compared to control oocytes (Figure 5C). These results suggested that the G103W mutation impaired both PIP2;1-mediated water and CO<sub>2</sub> transport (see discussion).

Surface pH changes of oocytes suggested that PIP2;1 and βCA4 co-expression together enhanced CO<sub>2</sub> transport into oocytes more than expression of either protein alone (Figure 3E). We pursued mathematical modeling (Somersalo et al., 2012) to simulate PIP2;1 as enhancing the oocyte plasma membrane CO<sub>2</sub> permeability and βCA4 which enhances CO<sub>2</sub> catalysis in oocytes. We modeled the response of an oocyte following a sudden increase in external CO<sub>2</sub> concentration (see methods). Simulations were started with the internal CO<sub>2</sub> concentration set to 200 ppm and the external concentration increased from 200 ppm to 800 ppm (Hu et al., 2015). This sudden jump results in an influx of CO<sub>2</sub> and a transient increase in the membrane surface pH, pH<sub>s</sub> (Supplemental Figure 5).

Simulations show the predicted pH<sub>s</sub> as a function of time for an oocyte for our baseline parameters (i.e., low membrane permeability and no carbonic anhydrase

mediated acceleration of CO<sub>2</sub> catalysis) as a black line (Supplemental Figure 5). Consistent with Somersalo et al (2012), the predicted pH<sub>s</sub> increases, reached a transient maximum. The effect of carbonic anhydrases was simulated by setting an acceleration factor for CO<sub>2</sub> catalysis of F to 100 in the interior of oocytes. As a result of the accelerated dynamics, the predicted CO<sub>2</sub> influx was increased, resulting in an increase in the pH<sub>s</sub> values (Supplemental Figure 5). We also simulated the effect of PIP2;1 expression, without the presence of CA, by increasing the membrane permeability to P<sub>M,CO2</sub>=10 cm/s. As expected, this increase in membrane permeability increased the predicted CO<sub>2</sub> influx and the peak value of pH<sub>s</sub> (green line). Finally, we modeled the combined effects of PIP2;1 and carbonic anhydrases co-expression by setting P<sub>M,CO2</sub>=10 cm/s and F=100. Consistent with the experiments, this combination led to an even higher predicted increase in value of ΔpH<sub>s</sub> (blue line). Thus this model for CO<sub>2</sub> dynamics can capture the relative larger increase in ΔpH<sub>s</sub> upon co-expression of PIP2;1 and CA. Together with the experimental results (Figure 3E and Supplemental Figure 3), a threshold CO<sub>2</sub> influx may be required to produce a measurable change in SLAC1 activity.

### **PIP2;1 mutation alone did not significantly impair CO<sub>2</sub>- and ABA-regulation of stomatal movements**

To explore whether *PIP2;1 insertional* mutation in the PIP2;1 gene in *Arabidopsis* alone is sufficient to impair CO<sub>2</sub>-regulation of stomatal movements, we pursued stomatal conductance analyses in response to CO<sub>2</sub> concentration changes in *PIP2;1* T-DNA mutant plants. However, *pip2;1* mutant leaves showed similar stomatal responses to CO<sub>2</sub> changes as wildtype leaves (Figure 7A and 7B).

A recent study reported that *PIP2;1* knockout mutant plants have a defect in stomatal closure, specifically in response to ABA (Grondin et al., 2015). We also

investigated whether PIP2;1 is involved in the ABA-induced stomatal closing pathway, since the same aquaporins are known to transport water and CO<sub>2</sub> (Mori et al., 2014). Genotype-blind stomatal movement imaging analyses of individually mapped stomata showed that *pip2;1* single mutant stomata retained intact responses to 10 μM ABA treatment in time-course analyses of ABA-induced stomatal closing (Figure 7E). Furthermore, we also tested the effect of ABA on another published *pip2;1* mutant *pip2;1-2* (Grondin et al., 2015) in parallel, but stomata in both *pip2;1* and *pip2;1-2* mutant leaf epidermal layers closed to similar levels as wildtype one hour after ABA treatment (Figure 7F). These data indicated that PIP2;1 mutation alone was insufficient under the imposed conditions to impair the ABA-induced stomatal closing pathway. These relevant findings may be related to co-expression of multiple *PIP* homologs in *Arabidopsis* guard cells (Yang et al., 2008; Zhao et al., 2008; Bauer et al., 2013) and overlapping gene functions.

### **SLAC1 is likely to play the role of a bicarbonate responsive protein**

Our findings show that high intracellular bicarbonate could enhance SLAC1<sub>yc</sub>/OST1<sub>yn</sub>-mediated anion channel currents in *Xenopus* oocytes. These data indicated that either the OST1 protein kinase or SLAC1 or both proteins together may function as a bicarbonate responsive protein. To determine whether OST1 is essential for the CO<sub>2</sub>/HCO<sub>3</sub><sup>-</sup> response, we co-expressed SLAC1 with the protein kinases CPK6 or CPK23 in *Xenopus* oocytes, as these protein kinases are well-known to activate SLAC1 in *Xenopus* oocytes (Geiger et al., 2010; Brandt et al., 2012). Four independent batches of oocytes showed that injection of high intracellular NaHCO<sub>3</sub> or extracellular CO<sub>2</sub>/HCO<sub>3</sub><sup>-</sup> and co-expression of βCA4 and PIP2;1 with SLAC1 and CPK6 or CPK23 could enhance SLAC1 anion channel currents (Figures 8). Together these findings indicate that SLAC1 is likely to play

the role of a bicarbonate responsive protein, but SLAC1 requires a protein kinase to mediate channel activity.

### **RHC1 expression alone in oocytes produced ionic currents that were not affected by NaHCO<sub>3</sub> or OST1.**

During the course of this research a recent study identified the MATE transporter RHC1 as a candidate HCO<sub>3</sub><sup>-</sup> sensor when co-expressed with SLAC1, OST1 and HT1 in *Xenopus* oocytes (Tian et al., 2015). However, HCO<sub>3</sub><sup>-</sup> effects on oocytes expressing RHC1 alone or on oocytes expressing only OST1 and SLAC1 were not investigated. A full length RHC1 cDNA was obtained from a plant membrane protein cDNA collection (Jones et al., 2014). We then expressed the RHC1 cRNA in *Xenopus* oocytes with or without OST1. Unexpectedly, when expressing RHC1 alone oocytes showed ionic currents (Figure 9). The RHC1 MATE transporter-mediated currents were not affected by injection of 11.5 mM NaHCO<sub>3</sub> into *Xenopus* oocytes in the presence or absence of OST1, and OST1 did not enhance RHC1-mediated currents (Figure 9).

## **DISCUSSION**

The carbonic anhydrase  $\beta$ CA4 is involved in CO<sub>2</sub>-induced stomatal closing (Hu et al., 2010; Hu et al., 2015). To further investigate the CO<sub>2</sub> signaling mechanisms mediated by the  $\beta$ CA4 protein, we found  $\beta$ CA4 interacted with PIP2;1. The interaction of PIP2;1 with  $\beta$ CA4 may explain why  $\beta$ CA4 has been found to be located at the intracellular side of the plasma membrane in plant cells even though  $\beta$ CA4 does not have a transmembrane domain (Fabre et al., 2007; Hu et al., 2015). It has been widely demonstrated that CO<sub>2</sub> is transported across biomembranes via aquaporins: The tobacco aquaporin NtAQP1 displays CO<sub>2</sub>

transport activity in *Xenopus* oocytes (Uehlein et al., 2003). The *Arabidopsis* AtPIP1;2 aquaporin displays CO<sub>2</sub> permeability in a yeast expression system (Heckwolf et al., 2011). Four barley HvPIP2 aquaporins were recently shown to display CO<sub>2</sub> permeability in *Xenopus* oocytes (Mori et al., 2014). Expression of PIP2;1 resulted in a change in the surface pH of oocytes (Musa-Aziz et al., 2009, 2014), showing that *Arabidopsis* PIP2;1 is permeable to CO<sub>2</sub>.

During the completion phase of the present study the RHC1 MATE transporter was identified and reported to function as a bicarbonate sensor candidate based on intracellular HCO<sub>3</sub><sup>-</sup> enhancement of SLAC1/OST1/RHC1/HT1-mediated anion channel currents in *Xenopus* oocytes (Tian et al., 2015). Whether SLAC1/OST1 co-expression alone also enables HCO<sub>3</sub><sup>-</sup>-enhancement of SLAC1-mediated currents and whether RHC1 alone produces an electrogenic current was not investigated in this recent study. In the present study, we focused on the questions whether (1) high intracellular HCO<sub>3</sub><sup>-</sup> can enhance S-type anion channel currents in *Xenopus* oocytes? (2) Can we reconstitute extracellular CO<sub>2</sub>/HCO<sub>3</sub><sup>-</sup> regulation of SLAC1-mediated anion currents? (3) Can we identify a candidate HCO<sub>3</sub><sup>-</sup> responsive protein?

Our experiments show that RHC1 expression alone mediates a clear ionic current in *Xenopus* oocytes that is not dependent on HCO<sub>3</sub><sup>-</sup> injection or OST1 co-expression. These findings are consistent with other plant MATE transporters that upon expression produce anion currents in *Xenopus* oocytes (Melo et al., 2013; Maron et al., 2010). Our experiments do not strictly exclude a role for RHC1 in CO<sub>2</sub> signaling (Tian et al., 2015), but point to the need to investigate whether previous findings might result at least in part from additive currents mediated by SLAC1 and RHC1.

Intracellular bicarbonate enhances S-type anion channel currents in wild-type *Arabidopsis* guard cells (Hu et al., 2010; Xue et al., 2011; Tian et al., 2015). To

mimic this process, we co-expressed SLAC1/OST1, SLAC1/CPK6 or SLAC1/CPK23 in *Xenopus* oocytes. We then microinjected NaHCO<sub>3</sub> into oocytes at the same concentrations that enhance S-type anion channel currents in guard cells (Hu et al., 2010; Xue et al., 2011; Tian et al., 2015). We found that high intracellular HCO<sub>3</sub><sup>-</sup> could enhance SLAC1yc/OST1yn, SLAC1/CPK6 and SLAC1/CPK23-mediated anion channel currents in *Xenopus* oocytes. As the common protein in these analyses is SLAC1, these findings implicate SLAC1 as a candidate CO<sub>2</sub>/HCO<sub>3</sub><sup>-</sup> sensing protein.

The present findings show that enhancement of SLAC1 activity by intracellular CO<sub>2</sub>/HCO<sub>3</sub><sup>-</sup> requires the presence of protein kinases (Figure 1). These findings are consistent with the requirements of protein kinase-mediated phosphorylation for activation of SLAC1 (Geiger et al., 2009; Lee et al., 2009; Geiger et al., 2010; Brandt et al., 2012; Hua et al., 2012) and the requirement of the OST1 protein kinase for CO<sub>2</sub> signal transduction in plants (Xue et al., 2011; Merilo et al., 2013).

### **More than one CO<sub>2</sub>/HCO<sub>3</sub><sup>-</sup> sensing pathway in guard cells.**

Note that the present findings do not exclude and indeed support the possibility of more than one CO<sub>2</sub>/HCO<sub>3</sub><sup>-</sup> sensing mechanism in guard cells, as present and previous findings implicate the need for an active OST1 protein kinase in order for CO<sub>2</sub> signal transduction to proceed (Xue et al., 2011; Merilo et al., 2013).

Furthermore, our present research shows that while NaHCO<sub>3</sub> enhances the activity of SLAC1, significant SLAC1 activity prevails in the absence of NaHCO<sub>3</sub> addition. Thus a second CO<sub>2</sub>/HCO<sub>3</sub><sup>-</sup> stimulated pathway would be required in guard cells that mediates activation of protein kinases that phosphorylate and activate SLAC1 (Geiger et al., 2009; Lee et al., 2009; Geiger et al., 2010; Brandt et al., 2012; Hua et al., 2012; Tian et al., 2015). This hypothesis is supported by a

recent study and modeling together suggesting that two distinct CO<sub>2</sub> signal transduction components exist in guard cells, one mediated by the plasma membrane located  $\beta$ CA4 and one dependent on the chloroplast-targeted  $\beta$ CA1 (Hu et al., 2015). Thus we propose that the direct HCO<sub>3</sub><sup>-</sup>-regulation of SLAC1 found here is not the only bicarbonate responsive protein in guard cells that contributes to CO<sub>2</sub>-induced stomatal closing.

### **PIP2;1 and $\beta$ CA4 are required for reconstitution of extracellular CO<sub>2</sub>/HCO<sub>3</sub><sup>-</sup> regulation**

Guard cell transcriptome studies have shown that multiple *PIP2* and *PIP1* aquaporin genes are expressed in guard cells under all investigated conditions (Leonhardt et al., 2004; Yang et al., 2008; Zhao et al., 2008; Bauer et al., 2013). These findings point to the hypothesis that higher order mutants in *PIP* aquaporin genes may be needed to affect stomatal CO<sub>2</sub> responses. Further research will be needed to investigate this hypothesis.

When  $\beta$ CA4 and PIP2;1 together with SLAC1<sub>yc</sub>/OST1<sub>yn</sub> were co-expressed in *Xenopus* oocytes, SLAC1 anion channel currents were enhanced in the presence of extracellular NaHCO<sub>3</sub>. In contrast a non-functional PIP2;1 point mutant was identified here, PIP2;1-G103W. PIP2;1-G103W was targeted to the plasma membrane of oocytes, but did not enable extracellular NaHCO<sub>3</sub>-dependent enhancement of SLAC1 anion channel currents in *Xenopus* oocytes. The non-functional PIP2;1 point mutant PIP2;1-G103W has a mutation analogous to a mutation previously predicted to impair function of the grapevine VvPIP2;5 aquaporin (Shelden et al., 2009). Two models have been considered for the structural pathway by which CO<sub>2</sub> is transported by aquaporins: (1) CO<sub>2</sub> may be transported via a central pore formed by an aquaporin tetramer. (2) An alternative model has been considered in which CO<sub>2</sub> is transported via the same



channel pore as water in aquaporins (Wang et al., 2007; Horsefield et al., 2009). In the present study, the *PIP2;1G103W* mutation disrupted both water and CO<sub>2</sub> transport, which might be interpreted to support a common pore model for water and CO<sub>2</sub> transport. However, more in depth studies would be needed to carefully investigate these two models, as one mutation is insufficient to make a strong conclusion.

The extracellular CO<sub>2</sub>/HCO<sub>3</sub><sup>-</sup> enhancement of SLAC1yc/OST1yn- mediated anion channel currents by  $\beta$ CA4 and PIP2;1 requires functional PIP2;1. We thus were able to reconstitute extracellular CO<sub>2</sub>/HCO<sub>3</sub><sup>-</sup> regulation of SLAC1-mediated anion currents in *Xenopus* oocytes by co-expression of  $\beta$ CA4, PIP2;1, SLAC1 and either OST1, CPK6 or CPK23. We propose a working model for mechanisms contributing to the CO<sub>2</sub> signalling pathway leading to stomatal closure. When the CO<sub>2</sub> concentration in leaves (*C*<sub>i</sub>) is elevated, CO<sub>2</sub> influx across the plasma membrane of guard cells is enhanced through aquaporins. The carbonic anhydrases accelerate the production of intracellular HCO<sub>3</sub><sup>-</sup>, and elevated intracellular CO<sub>2</sub>/HCO<sub>3</sub><sup>-</sup> enhances SLAC1 anion channel activity, triggering the closure of stomatal pores. When *C*<sub>i</sub> is low, as occurs during the light phase (Hanstein et al., 2001), the intracellular CO<sub>2</sub>/HCO<sub>3</sub><sup>-</sup> concentration is reduced and S-type anion channel activity is reduced.

## **METHODS**

### **Two-electrode voltage-clamp recordings in *Xenopus* oocytes.**

All constructs were cloned into the pNB1 oocyte expression vector using the USER method (Nour-Eldin et al., 2006). cRNAs were synthesized from 0.5-1  $\mu$ g of linearized plasmid DNA template using the mMessage mMachin *in vitro* Transcription Kit (Ambion). Approximately 20 ng of each indicated cRNA was

injected into oocytes for voltage-clamp recordings. Injected oocytes were incubated in ND96 buffer at 16°C for 2-3 days prior to electrophysiological recording. The ND96 buffer contained 10 mM MES/Tris (pH 7.5), 1 mM CaCl<sub>2</sub>, 1 mM MgCl<sub>2</sub> and 96 mM NaCl. Whole-cell ionic currents were recorded with a Cornerstone (Dagan) TEV-200 two-electrode voltage clamp amplifier and digitized using an Axon Instruments Digidata 1440A Low-Noise Data Acquisition System (Molecular Devices) controlled by pClamp acquisition software (Molecular Devices Sunnyvale, CA, USA). Microelectrodes were fabricated with a P-87 Flaming/Brown microelectrode micropipette puller (Sutter, Novato, CA) from borosilicate glass (GC200TF-10; Warner Instruments, Hamden, CT, USA) and the tips were filled with 3M KCl. The resistance of the filled electrodes was 0.5–1.5 mΩ.

As oocytes batches vary in the protein expression level among batches and thus the magnitude of ionic currents from one week to another varies, the indicated controls were included in each batch of oocytes and control conditions were recorded intermittently with investigated conditions to avoid a time of measurement dependence of data. Furthermore, data from one representative batch of oocytes are shown with controls in each figure, and were reproduced in at least three independent oocyte batches as indicated in results. The numbers of oocytes recorded for each condition in the depicted batch of oocytes are also provided in the figures. Oocytes were recorded in 10 mM MES/Tris (pH 7.4), 1 mM MgCl<sub>2</sub>, 1 mM CaCl<sub>2</sub>, 2 mM KCl, 24 mM NaCl, and 70 mM Na-gluconate buffer. Osmolality was adjusted to 220 mM using D-sorbitol. Steady state currents were recorded starting from a holding potential of 0 mV and ranging from +40 to -160 mV in -20 mV decrements, followed by a -120 mV voltage “tail” pulse. Note that the time-dependent properties of SLAC1 channel in *Xenopus* oocytes vary among individual oocytes. This variability in time-dependent properties was noted

in early studies of S-type anion channel currents in guard cells (Schmidt and Schroeder, 1994), and may depend on posttranslational modification of the channel protein that requires further analyses. Data were low-pass-filtered at 20 kHz throughout all recordings. For application of intracellular bicarbonate, NaHCO<sub>3</sub> was injected into each oocyte and the final concentration is given in the figures caption. The concentrations of free bicarbonate and CO<sub>2</sub> were calculated using the Henderson–Hasselbalch equation ( $\text{pH} = \text{pK}_1 + \log [\text{HCO}_3^-]/[\text{CO}_2]$ ), where [HCO<sub>3</sub><sup>-</sup>] represents the free bicarbonate concentration and [CO<sub>2</sub>] represents the free CO<sub>2</sub> concentration; pK<sub>1</sub> = 6.352 was used for the calculation (Speight, 2005). Injection of 11.5 mM NaHCO<sub>3</sub> results in 10.5 mM free HCO<sub>3</sub><sup>-</sup> and 1mM free CO<sub>2</sub> at pH 7.4. The calculation of intracellular bicarbonate was based on cytosolic oocyte volumes ≈ 500 nL, and the volume of injected NaHCO<sub>3</sub> buffer was 50 nL. Bicarbonate microinjections were performed 20 min before voltage-clamp experiments. All experiments were performed at room temperature. Surface pH measurements and the water swelling assay in *Xenopus* oocytes were performed as described in (Geyer et al., 2013; Musa-Asziz et al., 2014). Briefly, a baked, silanized (*bis*-di-(methylamino)-dimethylsilane; Sigma-Aldrich, cat. no. 14755) borosilicate glass microelectrode, with a H<sup>+</sup> Ionophore I, mixture B, (Sigma-Aldrich, cat. no. 95293) liquid membrane at its 15 μm (inner diameter) tip, and backfilled with a solution (containing, in mM, 40 KH<sub>2</sub>PO<sub>4</sub>, 23 NaOH, 15 NaCl, adjusted to pH 7.0) was used to measure pH<sub>s</sub>. The pH<sub>s</sub> microelectrode was connected to a FD223 electrometer; (World Precision Instruments, Sarasota, FL, USA) and mounted on an ultrafine micromanipulator (model MPC-200 system; Sutter Instrument Co., Novato, CA) to position the pH<sub>s</sub>-electrode tip at the surface of the oocyte. To record pH<sub>s</sub>, the tip was then advanced a further ~40 μm, creating a visible dimple on the oocyte membrane. Periodically the electrode tip was withdrawn ~300 μm for recalibration in the bulk extracellular fluid (pH 7.50).

Composition of ND96 and 5% CO<sub>2</sub>/33 mM HCO<sub>3</sub><sup>-</sup> solutions were as described in Musa-Aziz et al. (2014) and flowed into the chamber at 4 ml/min.

### **Confocal Microscopy**

Confocal imaging of PIP2;1-YFP fusion proteins expressed in *Xenopus* oocytes was acquired by spinning-disc confocal microscopy (Nikon Eclipse TE2000-U). Images show an optical slice of each oocyte. Fluorescence imaging Images were captured with an electron multiplying charge-coupled device (EMCCD) camera (Cascade II: 512, Photometrics, Tucson, AZ, USA) using Metamorph software (Universal Imaging, Downington, PA, USA).

### **Yeast two-hybrid Screen**

For isolation of  $\beta$ CA4-interacting proteins, a yeast two-hybrid screen was conducted.  $\beta$ CA4 was fused with GAL4-BD in the vector pGBKT7 (Causier and Davies, 2002). pGBKT7- $\beta$ CA4 was used as bait to screen for interacting proteins from a normalized commercial *Arabidopsis* cDNA library constructed in the pGADT7 vector (Clontech). pGBKT7- $\beta$ CA4 was transformed into the yeast strain Y2HGold and the library was in the Y187 strain. The mating method was adopted and diploid cells were grown on the SD-Leu-Trp medium plus 40 mg/mL x-gal at pH 5.8. Interactions were detected as blue cells, but no robust yeast 2-hybrid interactors of  $\beta$ CA4 were identified in this screen.

### **Split-ubiquitin system analyses**

The split-ubiquitin system was adopted and improved to test direct protein-protein interactions and to screen  $\beta$ CA-interacting proteins from an *Arabidopsis* cDNA library (Grefen et al., 2007). The  $\beta$ CA4 cDNA was cloned into the vector pMetYC-DEST. pMetYC- $\beta$ CA4 was used as a bait to screen an *Arabidopsis* cDNA

library, which was constructed in the prey vector pNX33-DEST. The THYAP4 yeast colonies transformed with pMetYC- $\beta$ CA4 were mated with the THYAP5 yeast transformed with 3  $\mu$ g of *Arabidopsis* cDNA library (Grefen et al., 2007). The co-transformants were grown on SD-Leu-Trp medium plus 40mg/mL x-gal at pH5.8. Blue colonies indicated putative interactions.

### **BiFC experiments in *N. benthamiana***

For split YFP complementation assays (BiFC), the vectors pXCSG-YN155 and pXCSG-YC84 were used (Chen et al., 2008). To generate the  $\beta$ CA4-YC84 and PIP2;1-YN155 constructs, full-length PIP2;1 cDNA without stop codons was amplified and cloned into the binary vector pXCSG-YN155, and a 836 bp  $\beta$ CA4 cDNA without stop codons was amplified and cloned as a fusion with the binary vector pXCSG-YC84. Split luciferase assays were carried out as described (Chen et al., 2008). Briefly, the PIP2;1 cDNA was cloned into a vector containing the C-terminal half of luciferase (cLUC) and  $\beta$ CA4 was cloned into the N-terminal half of luciferase (nLUC). These constructs were transformed into the *Agrobacterium* strain GV3101 and then co-infiltrated into *N. benthamiana* leaves with P19 at an OD<sub>600</sub> of 0.8. After three days of infiltration, the infiltrated leaves were harvested for bioluminescence detection. Images were captured with a CCD camera.

### **Co-immunoprecipitation experiments in *N. benthamiana***

The *Agrobacterium* strain GV3101 with the helper plasmid pMP90K carrying  $\beta$ CA4 and PIP2;1 was co-infiltrated at an OD<sub>600</sub> of 0.8 together with the p19 strain in *N. benthamiana*. Protein extraction was performed with infiltrated leaves after three days of infiltration (Nishimura et al., 2010). Infiltrated leaves were then sprayed with water containing 0.01% Silwet L-77 after 3 days infiltration before leaf excision. 1.0 g leaves were ground in liquid nitrogen and the powder tissues

were re-suspended with 2.0 mL of extraction buffer (50 mM Na-phosphate (pH7.4), 1 mM DTT, 0.1% NP-40, 150 mM NaCl, and 1x protease inhibitor cocktail). Crude extracts were centrifuged at 18,000 g for 20 min at 4°C. Supernatant passed through Miracloth (Calbiochem) was used for immunoprecipitation as an input. Input proteins were incubated with 50 µL anti-HA matrix for 3 h at 4°C and the immune-complexes were washed four times with 500 µL washing buffer (50 mM Na-phosphate (pH7.4), 150 mM NaCl, 0.1% NP-40). Proteins were separated by 10% SDS-PAGE gel and electrotransferred onto immobilon-P membrane. Membrane was blocked overnight in PBS-T buffer with 5% skim milk (Biorad), then washed three times with PBS-T buffer and incubated with anti-GFP or anti-HA antibodies. The membranes were incubated with 1:10000 diluted anti-mouse HRP-conjugated for 1 h. Bio-Rad's Clarity ECL western blotting substrate was then used to perform detection.

### **Time-resolved intact leaf stomatal conductance experiments with [CO<sub>2</sub>] shifts**

To identify the *PIP2;1* T-DNA insertion mutation, we used two qPCR primers:

F: TACCACCAATTCGTTCTG; R: AGAGATCACAACTTCATTTATTC.

Four to six week old plants growing in a growth chamber at 70% humidity were used for intact-leaf CO<sub>2</sub>-induced stomatal conductance change analyses as previously described (Hu et al., 2010). Briefly, stomatal conductance was firstly stabilized at 400 ppm of [CO<sub>2</sub>] and recorded for an additional 30 min, then [CO<sub>2</sub>] was shifted to elevated CO<sub>2</sub> for 30 min and then again changed to 100 ppm. The data shown are means of 4 leaves per genotype per treatment ± s.e.m. Relative stomatal conductances were calculated by normalization with respect to the average of the final ten data points at 400 ppm [CO<sub>2</sub>] before elevating [CO<sub>2</sub>].

## Stomatal aperture measurements

Three week-old *Arabidopsis* plants grown in a growth chamber at 70% humidity were used for analyses of stomatal movements in response to ABA. Intact leaf epidermal layers with no mesophyll cells in the vicinity were prepared as described (Hu et al., 2010; Xue et al., 2011). Leaf epidermal layers were preincubated for 2 h in opening buffer (10 mM MES, 10 mM KCl, 50  $\mu$ M CaCl<sub>2</sub> at pH 6.15) and then incubated with buffers supplemented with 10  $\mu$ M ABA. For time course analyses, individual stomata were imaged and individually tracked at different time points. Stomatal apertures were measured using ImageJ (Schneider et al., 2012). Data shown are from genotype blind analyses (n = 3 experiments, 30 stomata per experiment and condition).

## Simulation of CO<sub>2</sub> transport in oocytes

Our model describes the dynamics of CO<sub>2</sub> influx using a set of differential equations and is detailed in previous work (Somersalo et al., 2012). Briefly, it consists of a spherical oocyte of radius 650  $\mu$ m surrounded by a layer of unconvected extracellular fluid of thickness d=100  $\mu$ m in which reactions can take place. The oocyte and fluid layer are immersed in a bath in which the concentration of the reactants are assumed to be constant. Within the layer and the oocyte the model describes the formation and disassociation of carbonic acid as:

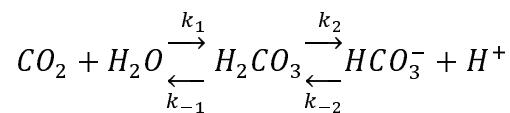

where  $k_1$ ,  $k_{-1}$ ,  $k_2$ , and  $k_{-2}$  are rate constants. In addition, we assumed that there is one non  $CO_2/HCO_3^-$  buffer, denoted by  $HA/A^-$ .

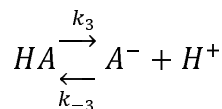

We assumed that the membrane is permeable to  $\text{CO}_2$  and incorporated intracellular carbonic anhydrase- like activity by multiplying the rate constants  $k_1$  and  $k_{-1}$  by an acceleration factor  $A$ . Assuming spherical symmetry, the rate equations corresponding to the above reactions can be solved along a radial line using the methods-of-line algorithm. All parameters and initial conditions were chosen as in the study by *Somersalo et al.*, 2012 with the exception of the membrane permeability  $P_{\text{M CO}_2}$ , which was chosen to be lower.

## SUPPLEMENTAL FIGURE

**Supplemental figure 1.** Injection of 11.5 mM  $\text{NaHCO}_3$  (pH 7 or pH 8) into oocytes also causes enhancement of SLAC1-mediated anion channel currents, whereas 23 mM sorbitol has no effect on SLAC1 activity. Data are mean  $\pm$  s.e.m.

**Supplemental figure 2.** Steady-state current-voltage relationships show the average magnitude of SLAC1yc/OST1yn-mediated anion channel currents recorded from oocytes injected with 11.5 mM NaCl were reduced rather than enhanced. Data are mean  $\pm$  s.e.m. Data are representative of experiments performed on three independent oocyte batches.

**Supplemental figure 3.** Surface pH ( $\text{pH}_s$ ) measurements from oocytes exposed to  $\text{CO}_2/\text{HCO}_3^-$ . Oocytes were exposed to 5%  $\text{CO}_2/33$  mM  $\text{HCO}_3^-$  long enough for the  $\text{pH}_s$  to rise and then decay exponentially to a stable value. Traces from oocytes recorded in the same batch are shown.

**Supplemental figure 4.** The *PIP2;1-W85A* and *PIP2;1-F210A* mutation isoforms did not impair the PIP2;1-CA4 enhancement of SLAC1/OST1-mediated anion



channel currents in oocytes by extracellular  $\text{CO}_2/\text{HCO}_3^-$ . **(A)** Whole-cell currents were recorded from oocytes expressing the indicated cRNAs with 11.5 mM  $\text{NaHCO}_3$  in the bath solution. The voltage protocol was the same as in Figure 1. **(B)** Steady-state current-voltage relationships from oocytes recorded as in (A). Data are mean  $\pm$  s.e.m. Results from three independent batches of oocytes showed similar results.

**Supplemental Figure 5** Simulated membrane surface pH ( $\text{pH}_s$ ) as a function of time for baseline parameter values (black curve), in the presence of intracellular carbonic anhydrase (CA) activity (red curve), for simulated increased membrane  $\text{CO}_2$  permeability (green curve), and in the presence of both intracellular CA activity and increased membrane  $\text{CO}_2$  permeability (blue curve).

**Supplemental figure 6 (A)** Structure of *PIP2;1* gene and T-DNA insertion. *PIP2;1* consists of four exons (open boxes); black boxes highlight the 5' and 3' untranslated regions, respectively. Mutant line *pip2;1* (ABRC stock name CS320492) has a T-DNA insertion in 5'-UTR region. **(B)** qPCR analyses showed that *pip2;1* was a knockdown mutant. Expression level was compared to EF-1a.

## ACKNOWLEDGEMENTS

We thank Aaron Stephan (University of California San Diego), Benjamin Brandt (University of Geneva, CH) and Fraser Moss (Case Western Reserve University) for comments on the manuscript. This research was funded by a grant from the National Science Foundation (MCB1414339) to J.I.S and W.J.R, and in part supported by grants from the National Institutes of Health (GM060396-ES010337) to J.I.S. and the China National Natural Science Foundation (31271515) and the

Fundamental Research Funds for the Central Universities (2662015PY179) to H.H. Surface pH experiments were supported by American Heart Association Postdoctoral Fellowships (AHA09POST2060873 and AHA11POST7670014) to X.Q. and Office of Naval Research Grants (N00014-11-1-0889; N00014-14-1-0716; N00014-15-1-2060), the National Institutes of Health (U01-GM111251) and the Meyer/Scarpa Chair to W.F.B.

## AUTHOR CONTRIBUTIONS

C.W performed all of the oocyte TEVC electrophysiological experiments and data analyses. H.H. performed S.U.S., bimolecular fluorescence complementation and co-immunoprecipitation experiments at UCSD. X.Q. and B.Z. performed surface pH experiments and C.W., X.Q. and B.Z. performed Pf measurements on *Xenopus* oocytes. D.X. performed split luciferase experiments. W.J.R. constructed the mathematical model. The project was conceived by J.I.S. and C.W., H.H., W.F.B., and J.I.S. contributed to the research design, provided support and suggestions throughout the research and manuscript preparation. C.W. and J.I.S. wrote the manuscript with contributions from other authors.

## REFERENCES

- Ainsworth, E.A., and Long, S.P.** (2005). What have we learned from 15 years of free air CO<sub>2</sub> enrichment (FACE)? A meta-analytic review of the responses of photosynthesis, canopy properties and plant production to rising CO<sub>2</sub>. *New Phytologist* **165**, 351-372.
- Battisti, D.S., and Naylor, R.L.** (2009). Historical warnings of future food insecurity with unprecedented seasonal heat. *Science* **323**, 240-244.

- Bauer, H., Ache, P., Lautner, S., Fromm, J., Hartung, W., Al-Rasheid, K.A., Sonnewald, S., Sonnewald, U., Kneitz, S., Lachmann, N., Mendel, R.R., Bittner, F., Hetherington, A.M., and Hedrich, R.** (2013). The stomatal response to reduced relative humidity requires guard cell-autonomous ABA synthesis. *Current Biology* **23**, 53-57.
- Bracha-Drori, K., Shichrur, K., Katz, A., Oliva, M., Angelovici, R., Yalovsky, S., and Ohad, N.** (2004). Detection of protein–protein interactions in plants using bimolecular fluorescence complementation. *The Plant Journal*, **40**(3), 419-427.
- Brandt, B., Brodsky, D.E., Xue, S., Negi, J., Iba, K., Kangasjarvi, J., Ghassemian, M., Stephan, A.B., Hu, H., and Schroeder, J.I.** (2012). Reconstitution of abscisic acid activation of SLAC1 anion channel by CPK6 and OST1 kinases and branched ABI1 PP2C phosphatase action. *Proceedings of the National Academy of Sciences of the United States of America* **109**, 10593-10598.
- Causier, B., and Davies, B.** (2002). Analysing protein-protein interactions with the yeast two-hybrid system. *Plant Molecular Biology* **50**, 855-870.
- Chen, H., Zou, Y., Shang, Y., Lin, H., Wang, Y., Cai, R., Tang, X., and Zhou, J.M.** (2008). Firefly luciferase complementation imaging assay for protein-protein interactions in plants. *Plant Physiology* **146**, 368-376.
- Fabre, N., Reiter, I.M., Becuwe-Linka, N., Genty, B., and Rumeau, D.** (2007). Characterization and expression analysis of genes encoding alpha and beta carbonic anhydrases in Arabidopsis. *Plant, Cell & Environment* **30**, 617-629.
- Frommer, W.B.** (2010). CO<sub>2</sub> common sense. *Science* **327**, 275-276.
- Fujiyoshi, Y., Mitsuoka, K., de Groot, B.L., Philippsen, A., Grubmiller, H., Agre, P., and Engel, A.** (2002). Structure and function of water channels. *Current Opinion in Structural Biology* **12**, 509-515.

**Geiger, D., Scherzer, S., Mumm, P., Stange, A., Marten, I., Bauer, H., Ache, P., Matschi, S., Liese, A., Al-Rasheid, K.A., Romeis, T., and Hedrich, R.** (2009). Activity of guard cell anion channel SLAC1 is controlled by drought-stress signaling kinase-phosphatase pair. *Proceedings of the National Academy of Sciences of the United States of America* **106**, 21425-21430.

**Geiger, D., Scherzer, S., Mumm, P., Marten, I., Ache, P., Matschi, S., Liese, A., Wellmann, C., Al-Rasheid, K.A., Grill, E., Romeis, T., and Hedrich, R.** (2010). Guard cell anion channel SLAC1 is regulated by CDPK protein kinases with distinct Ca<sup>2+</sup> affinities. *Proceedings of the National Academy of Sciences of the United States of America* **107**, 8023-8028.

**Geyer, R. R., Musa-Aziz, R., Qin, X., and Boron, W. F. (2013).** Relative CO<sub>2</sub>/NH<sub>3</sub> selectivities of mammalian aquaporins 0–9. *American Journal of Physiology Cell Physiology*, 304(10), C985-C994.

**Grefen, C., Lalonde, S., and Obrdlik, P.** (2007). Split-ubiquitin system for identifying protein-protein interactions in membrane and full-length proteins. *Current Protocols in Neuroscience / Editorial Board*, **Chapter 5**, Unit 5, 27.

**Grondin, A., Rodrigues, O., Verdoucq, L., Merlot, S., Leonhardt, N., and Maurel, C.** (2015). Aquaporins contribute to ABA-triggered stomatal closure through OST1-mediated phosphorylation. *The Plant Cell*, **27**, 1945-1954.

**Hanstein, S., Beer, D., and Felle, H.H.** (2001). Miniaturised carbon dioxide sensor designed for measurements within plant leaves. *Sensors and Actuators B: Chemical*, **81**, 107-114.

**Hashimoto, M., Negi, J., Young, J., Israelsson, M., Schroeder, J.I., and Iba, K.** (2006). Arabidopsis HT1 kinase controls stomatal movements in response to CO<sub>2</sub>. *Nature Cell Biology* **8**, 391-397.

**Heckwolf, M., Pater, D., Hanson, D.T., and Kaldenhoff, R.** (2011). The

*Arabidopsis thaliana* aquaporin AtPIP1;2 is a physiologically relevant CO<sub>2</sub> transport facilitator. *The Plant Journal* **67**, 795-804.

**Hetherington, A.M., and Woodward, F.I.** (2003). The role of stomata in sensing and driving environmental change. *Nature* **424**, 901-908.

**Holden, C.** (2009). Higher temperatures seen reducing global harvests. *Science* **323**, 193-193.

**Horsefield, R., Norden, K., Fellert, M., Backmark, A., Tornroth-Horsefield, S., Terwisscha van Scheltinga, A.C., Kvassman, J., Kjellbom, P., Johanson, U., and Neutze, R.** (2008). High-resolution x-ray structure of human aquaporin 5. *Proceedings of the National Academy of Sciences of the United States of America* **105**, 13327-13332.

**Hu, H., Boisson-Dernier, A., Israelsson-Nordstrom, M., Bohmer, M., Xue, S., Ries, A., Godoski, J., Kuhn, J.M., and Schroeder, J.I.** (2010). Carbonic anhydrases are upstream regulators of CO<sub>2</sub>-controlled stomatal movements in guard cells. *Nature Cell Biology* **12**, 87-93.

**Hu, H., Rappel, W. J., Occhipinti, R., Ries, A., Bohmer, M., You, L., Xiao, C.L., Engineer, C.B., Boron, W.F., and Schroeder, J. I.** (2015). Distinct cellular locations of carbonic anhydrases mediate CO<sub>2</sub> control of stomatal movements. *Plant Physiology*, 00646.

**Hua, D., Wang, C., He, J., Liao, H., Duan, Y., Zhu, Z., Guo, Y., Chen, Z., and Gong, Z.** (2012). A plasma membrane receptor kinase, GHR1, mediates abscisic acid- and hydrogen peroxide-regulated stomatal movement in *Arabidopsis*. *The Plant Cell* **24**, 2546-2561.

**Horsefield, R., Norden, K., Fellert, M., Backmark, A., Tornroth-Horsefield, S., van Scheltinga, A. C. T., Kvassma, j., Kjellbom, P., Johanson, U., and Neutze, R.** (2008). High-resolution x-ray structure of human aquaporin 5. *Proceedings of the National Academy of Sciences*, **105** (36), 13327-13332

- Jones, A.M., Xuan, Y., Xu, M., Wang, R.-S., Ho, C.-H., Lalonde, S., You, C.H., Sardi, M.I., Parsa, S.A., and Smith-Valle, E.** (2014). Border control a membrane-linked interactome of Arabidopsis. *Science* **344**, 711-716.
- Kim, T.H., Bohmer, M., Hu, H., Nishimura, N., and Schroeder, J.I.** (2010). Guard cell signal transduction network: advances in understanding abscisic acid, CO<sub>2</sub>, and Ca<sup>2+</sup> signaling. *Annual Review of Plant Biology* **61**, 561-591.
- Kukulski, W., Schenk, A.D., Johanson, U., Braun, T., de Groot, B.L., Fotiadis, D., Kjellbom, P., and Engel, A.** (2005). The 5A structure of heterologously expressed plant aquaporin SoPIP2;1. *Journal of Molecular Biology* **350**, 611-616.
- LaDeau, S.L., and Clark, J.S.** (2001). Rising CO<sub>2</sub> levels and the fecundity of forest trees. *Science* **292**, 95-98.
- Lee, S.C., Lan, W., Buchanan, B.B., and Luan, S.** (2009). A protein kinase-phosphatase pair interacts with an ion channel to regulate ABA signaling in plant guard cells. *Proceedings of the National Academy of Sciences of the United States of America* **106**, 21419-21424.
- Leonhardt, N., Kwak, J.M., Robert, N., Waner, D., Leonhardt, G., and Schroeder, J.I.** (2004). Microarray expression analyses of Arabidopsis guard cells and isolation of a recessive abscisic acid hypersensitive protein phosphatase 2C mutant. *The Plant Cell* **16**, 596-615.
- Maron, L.G., Pinerros, M.A., Guimaraes, C.T., Magalhaes, J.V., Pleiman, J.K., Mao, C., Shaff, J., Belicuas, S.N.J., and Kochian, L.V.** (2010). Two functionally distinct members of the MATE (multi-drug and toxic compound extrusion) family of transporters potentially underlie two major aluminum tolerance QTLs in maize. *The Plant Journal*, **61**, 728-740.
- Medlyn, B., Barton, C., Broadmeadow, M., Ceulemans, R., De Angelis, P., Forstreuter, M., Freeman, M., Jackson, S., Kellomki, S., and Laitat, E.**

(2001). Stomatal conductance of forest species after long term exposure to elevated CO<sub>2</sub> concentration: A synthesis. *New Phytologist* **149**, 247-264.

**Melo, J. O., Lana, U. G., Pineros, M. A., Alves, V., Guimaraes, C. T., Liu, J., Zheng, Y., Zhong, S., Fei, Z.J., Maron, L.G., Schaffert, R.E., Kochian, L.V., and Magalhaes, J.V.** (2013). Incomplete transfer of accessory loci influencing SbMATE expression underlies genetic background effects for aluminum tolerance in sorghum. *The Plant Journal*, **73**, 276-288.

**Merilo, E., Laanemets, K., Hu, H., Xue, S., Jakobson, L., Tulva, I., Gonzalez-Guzman, M., Rodriguez, P.L., Schroeder, J.I., and Brosch, M.** (2013). PYR/RCAR receptors contribute to ozone-, reduced air humidity-, darkness-and CO<sub>2</sub>-induced stomatal regulation. *Plant Physiology*, **162**, 1652-1668.

**Mori, I.C., Rhee, J., Shibasaka, M., Sasano, S., Kaneko, T., Horie, T., and Katsuhara, M.** (2014). CO<sub>2</sub> transport by PIP2 aquaporins of barley. *Plant & Cell Physiology* **55**, 251-257.

**Murata, Y., Mori, I.C., and Munemasa, S.** (2015). Diverse Stomatal Signaling and the Signal Integration Mechanism. *Annual Review of Plant Biology* **66**, 369-392.

**Musa-Aziz, R., Chen, L.-M., Pelletier, M.F., and Boron, W.F.** (2009). Relative CO<sub>2</sub>/NH<sub>3</sub> selectivities of AQP1, AQP4, AQP5, AmtB, and RhAG. *Proceedings of the National Academy of Sciences* **106**, 5406-5411.

**Musa-Aziz, R., Occhipinti, R., and Boron, W. F.** (2014). Evidence from simultaneous intracellular-and surface-pH transients that carbonic anhydrase IV enhances CO<sub>2</sub> fluxes across *Xenopus* oocyte plasma membranes. *American Journal of Physiology Cell Physiology*, **307**(9), C814-C840.

**Negi, J., Matsuda, O., Nagasawa, T., Oba, Y., Takahashi, H., Kawai-Yamada,**

- M., Uchimiya, H., Hashimoto, M., and Iba, K.** (2008). CO<sub>2</sub> regulator SLAC1 and its homologues are essential for anion homeostasis in plant cells. *Nature* **452**, 483-486.
- Nour-Eldin, H.H., Hansen, B.G., Norholm, M.H., Jensen, J.K., and Halkier, B.A.** (2006). Advancing uracil-excision based cloning towards an ideal technique for cloning PCR fragments. *Nucleic Acids Research* **34**, e122.
- Nyblom, M., Frick, A., Wang, Y., Ekvall, M., Hallgren, K., Hedfalk, K., Neutze, R., Tajkhorshid, E., and Tornroth-Horsefield, S.** (2009). Structural and functional analysis of SoPIP2;1 mutants adds insight into plant aquaporin gating. *Journal of Molecular Biology* **387**, 653-668.
- Nishimura, N., Sarkeshik, A., Nito, K., Park, S., Wang, A., Carvalho, P.C., Lee, S., Caddell, D.F., Cutler, S.R., Chory, J., Yates, J.R., and Schroeder, J.I.** (2010). PYR/PYL/RCAR family members are major in vivo ABI1 protein phosphatase 2C interacting proteins in Arabidopsis. *The Plant Journal* **61**, 290-299.
- Ohad, N., Shichrur, K., and Yalovsky, S.** (2007). The analysis of protein-protein interactions in plants by bimolecular fluorescence complementation. *Plant Physiology* **145**, 1090-1099.
- Ren, G., Cheng, A., Reddy, V., Melnyk, P., and Mitra, A.K.** (2000). Three-dimensional fold of the human AQP1 water channel determined at resolution by electron crystallography of two-dimensional crystals embedded in ice. *Journal of Molecular Biology* **301**, 369-387.
- Roelfsema, M.R., Hedrich, R., and Geiger, D.** (2012). Anion channels: master switches of stress responses. *Trends in Plant Science* **17**, 221-229.
- Schmidt, C., and Schroeder, J.I.** (1994). Anion selectivity of slow anion channels in the plasma membrane of guard cells (large nitrate permeability). *Plant Physiology* **106**, 383-391.



- Schneider, C. A., Rasband, W. S., and Eliceiri, K. W.** (2012). NIH Image to ImageJ: 25 years of image analysis. *Nature methods*, **9** (7), 671-675.
- Shelden, M.C., Howitt, S.M., Kaiser, B.N., and Tyerman, S.D.** (2009). Identification and functional characterisation of aquaporins in the grapevine, *Vitis vinifera*. *Functional Plant Biology* **36**, 1065-1078.
- Somersalo, E., Occhipinti, R., Boron, W. F., and Calvetti, D.** (2012). A reaction–diffusion model of CO<sub>2</sub> influx into an oocyte. *Journal of theoretical biology*, **309**, 185-203.
- Speight, J.G** (2005) *Lange's Handbook of Chemistry*. 16th edn New York, USA: McGraw-Hill Press.
- Tian, W., Hou, C., Ren, Z., Pan, Y., Jia, J., Zhang, H., Bai, F., Zhang, P., Zhu, H., He, Y., Luo, S., Li, L., and Luan, S.** (2015). A molecular pathway for CO<sub>2</sub> response in Arabidopsis guard cells. *Nature Communications* **6**, 6057.
- Uehlein, N., Lovisolo, C., Siefritz, F., and Kaldenhoff, R.** (2003). The tobacco aquaporin NtAQP1 is a membrane CO<sub>2</sub> pore with physiological functions. *Nature* **425**, 734-737.
- Uehlein, N., Sperling, H., Heckwolf, M., and Kaldenhoff, R.** (2012). The Arabidopsis aquaporin PIP1;2 rules cellular CO<sub>2</sub> uptake. *Plant, Cell & Environment* **35**, 1077-1083.
- Uehlein, N., Otto, B., Hanson, D.T., Fischer, M., McDowell, N., and Kaldenhoff, R.** (2008). Function of *Nicotiana tabacum* aquaporins as chloroplast gas pores challenges the concept of membrane CO<sub>2</sub> permeability. *The Plant Cell* **20**, 648-657.
- Vahisalu, T., Kollist, H., Wang, Y.F., Nishimura, N., Chan, W.Y., Valerio, G., Lamminmaki, A., Brosche, M., Moldau, H., Desikan, R., Schroeder, J.I., and Kangasjarvi, J.** (2008). SLAC1 is required for plant guard cell S-type anion channel function in stomatal signalling. *Nature* **452**, 487-491.

- Walter, M., Chaban, C., Schutze, K., Batistic, O., Weckermann, K., Nake, C., Blazevic, D., Grefen, C., Schumacher, K., Oecking, C., Halter, K., and Kudla, J.** (2004). Visualization of protein interactions in living plant cells using bimolecular fluorescence complementation. *The Plant Journal*, **40**(3), 428-438.
- Wang, Y., Cohen, J., Boron, W. F., Schulten, K., and Tajkhorshid, E.** (2007). Exploring gas permeability of cellular membranes and membrane channels with molecular dynamics. *Journal of structural biology*, **157** (3), 534-544.
- Xue, S., Hu, H., Ries, A., Merilo, E., Kollist, H., and Schroeder, J.I.** (2011). Central functions of bicarbonate in S-type anion channel activation and OST1 protein kinase in CO<sub>2</sub> signal transduction in guard cell. *The EMBO Journal* **30**, 1645-1658.
- Yang, Y., Costa, A., Leonhardt, N., Siegel, R.S., and Schroeder, J.I.** (2008). Isolation of a strong Arabidopsis guard cell promoter and its potential as a research tool. *Plant Methods* **4**, 6.
- Zhao, Z., Zhang, W., Stanley, B.A., and Assmann, S.M.** (2008). Functional proteomics of Arabidopsis thaliana guard cells uncovers new stomatal signaling pathways. *The Plant Cell* **20**, 3210-3226.

## FIGURE LEGENDS

**Figure 1.** Injection of 11.5 mM NaHCO<sub>3</sub> into oocytes causes enhancement of SLAC1-mediated anion channel currents when SLAC1 is co-expressed with OST1, while SLAC1 expression alone or water-injected oocytes did not show significant HCO<sub>3</sub><sup>-</sup> regulation.

**(A)** Whole-cell currents were recorded from oocytes expressing the indicated

cRNAs. During recordings of SLAC1 anion currents, single voltage pulses were applied in  $-20$  mV decrements from  $+40$  to  $-160$  mV for 4 s and the holding potential was 0 mV.

**(B)** Steady-state current-voltage relationships from oocytes recorded as in (A). Numbers of oocytes recorded for each condition in the same batch of oocytes are provided in the current-voltage panels in all figures. Data are mean  $\pm$  s.e.m. For some data points the symbols were larger than the s.e.m. and therefore error bars are not visible in current-voltage plots in (B). Results from over five independent batches of oocytes showed similar results.

**Figure 2.**  $\text{NaHCO}_3$  concentration-dependent enhancement of SLAC1-mediated anion channel currents when SLAC1 was co-expressed with OST1 in *Xenopus* oocytes.

**(A)** Whole-cell currents were recorded from oocytes after injection of the indicated final concentrations of  $\text{NaHCO}_3$ .

**(B)** Steady-state current-voltage relationships from oocytes recorded as in (A). Data are mean  $\pm$  s.e.m. For some data points the symbols were larger than the s.e.m. and therefore the error bars are not visible for some data points in (B). Results from three independent oocyte batches showed similar results.

**Figure 3.** The carbonic anhydrase  $\beta\text{CA4}$  interacts with the PIP2;1 protein and  $\beta\text{CA4}$  increases the  $\text{CO}_2$  permeability mediated by PIP2;1.

**(A)** The aquaporin PIP2;1 was identified as a  $\beta\text{CA4}$ -interacting protein by screening a split ubiquitin yeast two hybrid library. Interactions were shown in blue on the medium plus X-gal substrate.  $\beta\text{CA6}$  and soluble NubG were used as negative controls.

**(B, C)** Split YFP (B) and reversible split luciferase complementation assays (C)

showed that  $\beta$ CA4 interacts with PIP2;1 at the plasma membrane in tobacco leaves. Note that reversible split luciferase assays do not permit single cell resolution and a whole leaf is shown in (C). **(C, left)** cLUC-PIP2;1 with only nLUC was used as negative control, and showed no clear luciferase bioluminescence signal.

**(D)** Co-immunoprecipitation experiments show an interaction of  $\beta$ CA4 with the PIP2;1 aquaporin. Crude protein extracts from inoculated *Nicotiana benthamiana* leaves were used for immunoprecipitation as an input. Input protein was immuno-precipitated with anti-HA matrix. The input and immuno-precipitate (IP) were probed with anti-HA or anti-GFP antibodies as indicated.

**(E)**  $\beta$ CA4 and PIP2;1 enhance the CO<sub>2</sub> permeability of *Xenopus* oocytes as analyzed by membrane surface changes in pH. SIP1A- (At3g04090) & H<sub>2</sub>O-injected oocytes serve as control injections (\* P < 0.05).

**Figure 4.** Reconstitution of extracellular CO<sub>2</sub>/HCO<sub>3</sub><sup>-</sup> enhancement of SLAC1-mediated anion channels requires PIP2;1 and  $\beta$ CA4 in *Xenopus* oocytes.

**(A)** Increasing extracellular CO<sub>2</sub>/HCO<sub>3</sub><sup>-</sup> by addition of 11.5 mM NaHCO<sub>3</sub> did not enhance in SLAC1yc/OST1yn- expressing oocytes.

**(B)** Either  $\beta$ CA4 or PIP2;1 expressed alone together with SLAC1 and OST1 did not suffice to enhance SLAC1-mediated anion channel currents in *Xenopus* oocytes. Data in (A) and (B) are shown at -160 mV as mean  $\pm$  s.e.m.

**(C)** Co-expression of  $\beta$ CA4 and PIP2;1 with SLAC1yc/OST1yn did not significantly enhance ion currents in the bath solution without high CO<sub>2</sub>/HCO<sub>3</sub><sup>-</sup>.

**(D)** Whole cell currents were recorded from oocytes co-expressing the indicated cRNAs.  $\beta$ CA4 and PIP2;1 co-expression enhanced SLAC1/OST1-mediated anion channel currents in the presence of 11.5 mM NaHCO<sub>3</sub> in the bath solution.

**(E)** Steady-state current-voltage relationships from oocytes recorded as in (D). Data

are mean  $\pm$  s.e.m. The results were found in at least three independent batches of oocytes.

**Figure 5.** Osmotic water permeability coefficient, PIP2;1 location in *Xenopus* oocytes and surface pH analyses.

**(A)** PIP2;1-*G103W*- and non-PIP2;1- expressing control oocytes showed a low water permeability. Results are shown as means  $\pm$  s.e.m measurements from five to eight oocytes from one batch of oocytes.

**(B)** PIP2;1 and its point mutation isoforms as YFP-fusions were present in the vicinity of the oocytes plasma membrane, PIP2;1 alone served as a negative control.

**(C)** PIP2;1-*G103W* impaired the CO<sub>2</sub> permeability of PIP2;1 as measured by changes in pH<sub>s</sub>.

**Figure 6.** The PIP2;1-*G103W* mutant disrupted extracellular CO<sub>2</sub>/HCO<sub>3</sub><sup>-</sup> induced PIP2;1- $\beta$ CA4 enhancement of SLAC1/OST1-mediated anion channel currents in oocytes.

**(A)** Whole-cell currents were recorded from oocytes expressing the indicated cRNAs with 11.5 mM NaHCO<sub>3</sub> in the bath solution. The voltage protocol was the same as in Figure 1.

**(B)** Steady-state current-voltage relationships from oocytes recorded as in (A). Data are mean  $\pm$  s.e.m. Results from three independent experiments showed similar results.

**Figure 7.** PIP2;1 mutation alone did not significantly impair CO<sub>2</sub>-and ABA- regulation of stomatal movements.

**(A)** Time-resolved intact leaf stomatal conductance in *pip2;1* (CS320492) and wildtype Col (WT) plants with [CO<sub>2</sub>] shifts indicated at the bottom.

**(B)** Relative stomatal conductance data shown in (A).

**(C)** Time-coursed analysis of stomatal movements in response to ABA treatment in

individual mapped stomata in wildtype and *pip2;1* mutant. For these analyses individual stomata were imaged and tracked (Xue et al., 2011).

**(D)** Stomatal ABA responses were analyzed in two different *pip2;1* alleles.  $n = 3$  experiments, 30 stomata per experiment and condition, genotype blind. Data are mean  $\pm$  s.e.m.

**Figure 8.** Intracellular bicarbonate enhances currents mediated by the SLAC1 anion channel in both CPK6-SLAC1- or CPK23-SLAC1- expressing oocytes and extracellular bicarbonate enhances currents in  $\beta$ CA4, PIP2;1 and CPK6-SLAC1- or CPK23-SLAC1- co-expressing oocytes.

**(A, C)** Bicarbonate injection into oocytes enhances SLAC1 anion channel currents when SLAC1 was co-expressed with the  $\text{Ca}^{2+}$ -dependent protein kinases CPK6 or CPK23 rather than OST1 in oocytes.

**(B, D)**  $\beta$ CA4 and PIP2;1 co-expression with 11.5 mM  $\text{NaHCO}_3$  in the bath solution enhances SLAC1/CPK6- and SLAC1/CPK23-mediated anion channel currents. Data are mean  $\pm$  s.e.m. Results from four independent batches of oocytes showed similar results.

**Figure 9.** RHC1 expression in oocytes causes ionic currents and intracellular bicarbonate did not enhance RHC1- mediated anion channel currents in *Xenopus* oocytes in the presence or absence of the protein kinase OST1.

**(A)** Whole-cell currents were recorded from oocytes expressing the indicated cRNAs.

**(B)** Steady-state current-voltage relationships from oocytes recorded as in (A). Due to overlapping data of “RHC1” and “RHC1+ $\text{NaHCO}_3$ ” alternating data points are shown. Data are mean  $\pm$  s.e.m. Results from three independent experiments showed similar results.

## FIGURES

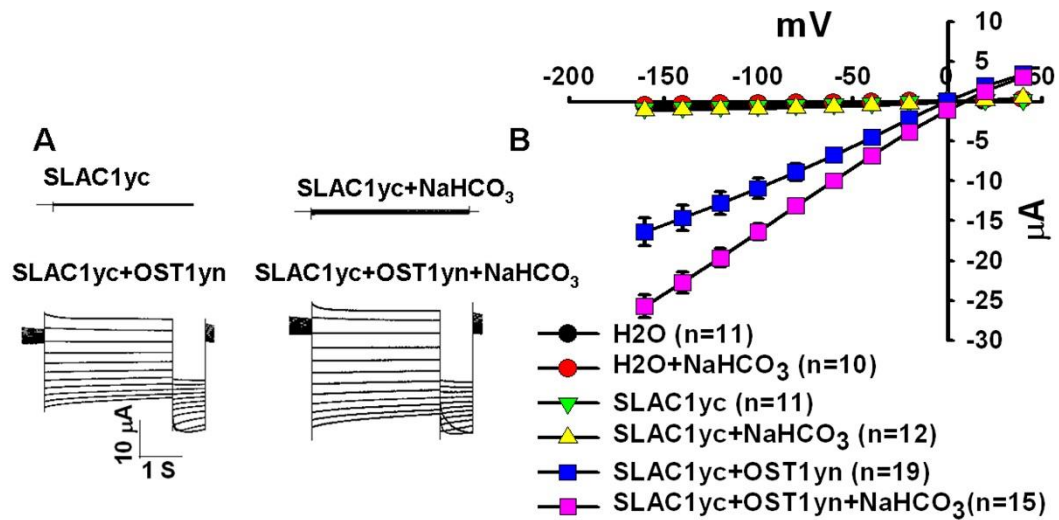

**Figure 1.** Injection of 11.5 mM NaHCO<sub>3</sub> into oocytes causes enhancement of SLAC1-mediated anion channel currents when SLAC1 is co-expressed with OST1, while SLAC1 expression alone or water-injected oocytes did not show significant HCO<sub>3</sub><sup>-</sup> regulation.

**(A)** Whole-cell currents were recorded from oocytes expressing the indicated cRNAs. During recordings of SLAC1 anion currents, single voltage pulses were applied in -20 mV decrements from +40 to -160 mV for 4 s and the holding potential was 0 mV.

**(B)** Steady-state current-voltage relationships from oocytes recorded as in (A). Numbers of oocytes recorded for each condition in the same batch of oocytes are provided in the current-voltage panels in all figures. Data are mean  $\pm$  s.e.m. For some data points the symbols were larger than the s.e.m. and therefore error bars are not visible in current-voltage plots in (B). Results from over five independent batches of oocytes showed similar results.

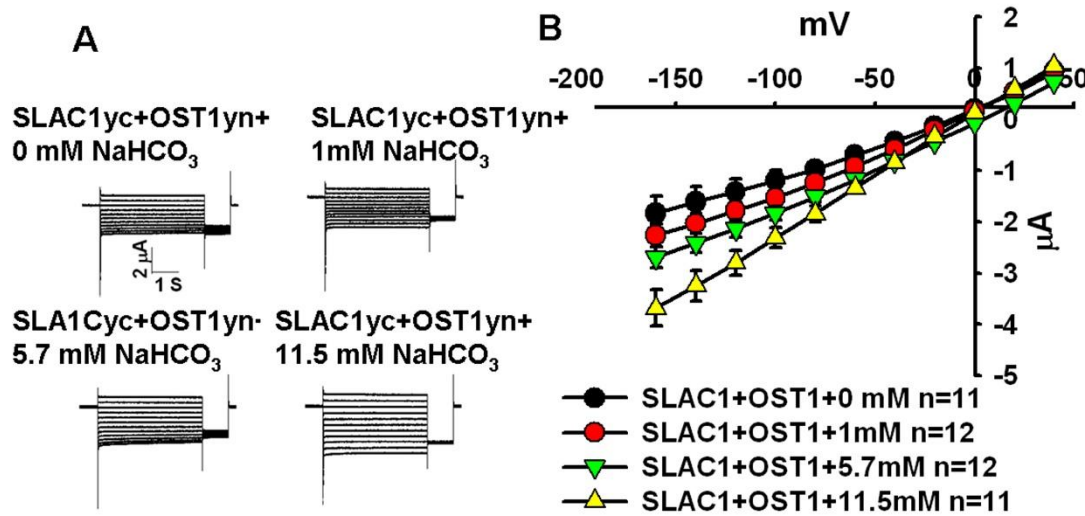

**Figure 2.** NaHCO<sub>3</sub> concentration-dependent enhancement of SLAC1-mediated anion channel currents when SLAC1 was co-expressed with OST1 in *Xenopus* oocytes.

**(A)** Whole-cell currents were recorded from oocytes after injection of the indicated final concentrations of NaHCO<sub>3</sub>.

**(B)** Steady-state current-voltage relationships from oocytes recorded as in (A). Data are mean  $\pm$  s.e.m. For some data points the symbols were larger than the s.e.m. and therefore the error bars are not visible for some data points in (B). Results from three independent oocyte batches showed similar results.



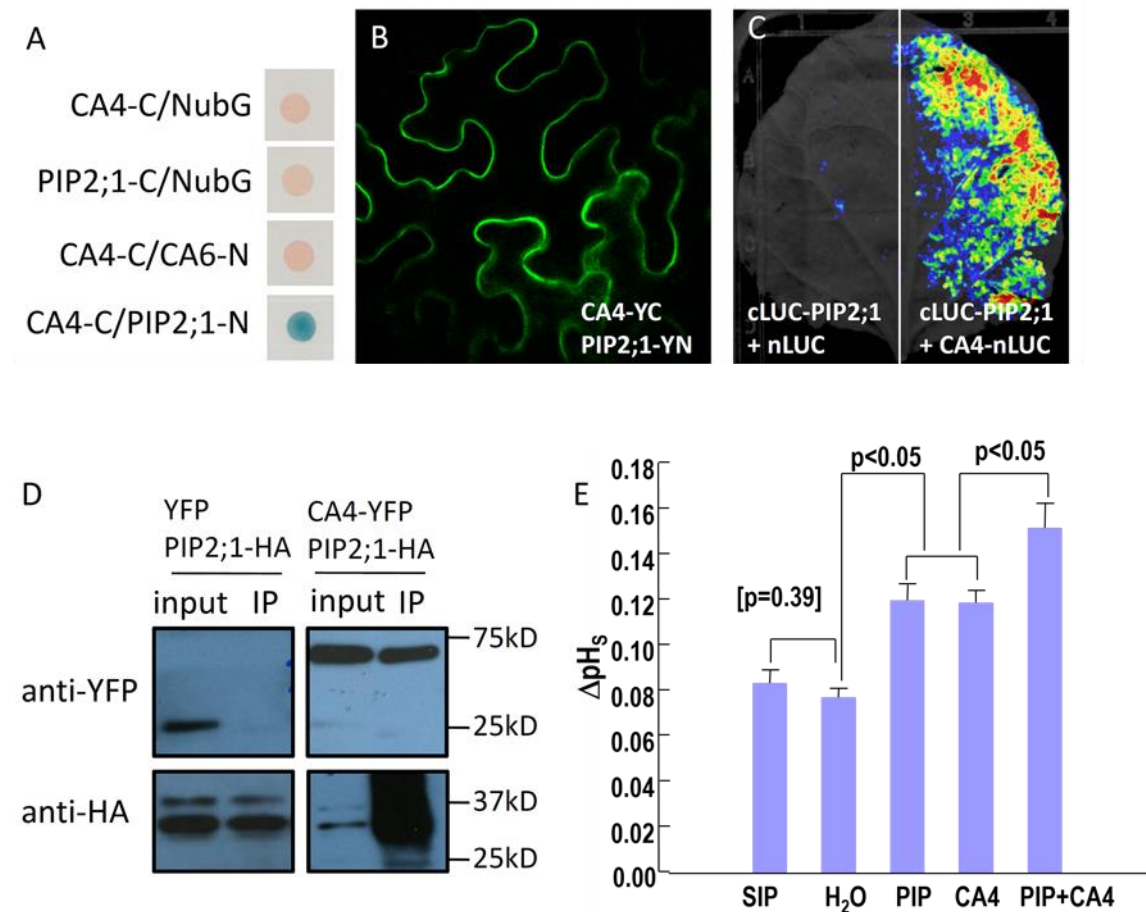

**Figure 3.** The carbonic anhydrase  $\beta$ CA4 interacts with the PIP2;1 protein and  $\beta$ CA4 increases the CO<sub>2</sub> permeability mediated by PIP2;1.

**(A)** The aquaporin PIP2;1 was identified as a  $\beta$ CA4-interacting protein by screening a split ubiquitin yeast two hybrid library. Interactions were shown in blue on the medium plus X-gal substrate.  $\beta$ CA6 and soluble NubG were used as negative controls.

**(B, C)** Split YFP (B) and reversible split luciferase complementation assays (C) showed that  $\beta$ CA4 interacts with PIP2;1 at the plasma membrane in tobacco leaves. Note that reversible split luciferase assays do not permit single cell resolution and a whole leaf is shown in (C). **(C, left)** cLUC-PIP2;1 with only nLUC

was used as negative control, and showed no clear luciferase bioluminescence signal.

**(D)** Co-immunoprecipitation experiments show an interaction of  $\beta$ CA4 with the PIP2;1 aquaporin. Crude protein extracts from inoculated *Nicotiana benthamiana* leaves were used for immunoprecipitation as an input. Input protein was immuno-precipitated with anti-HA matrix. The input and immuno-precipitate (IP) were probed with anti-HA or anti-GFP antibodies as indicated.

**(E)**  $\beta$ CA4 and PIP2;1 enhance the CO<sub>2</sub> permeability of *Xenopus* oocytes as analyzed by membrane surface changes in pH. SIP1A- (At3g04090) & H<sub>2</sub>O-injected oocytes serve as control injections (\* P < 0.05).

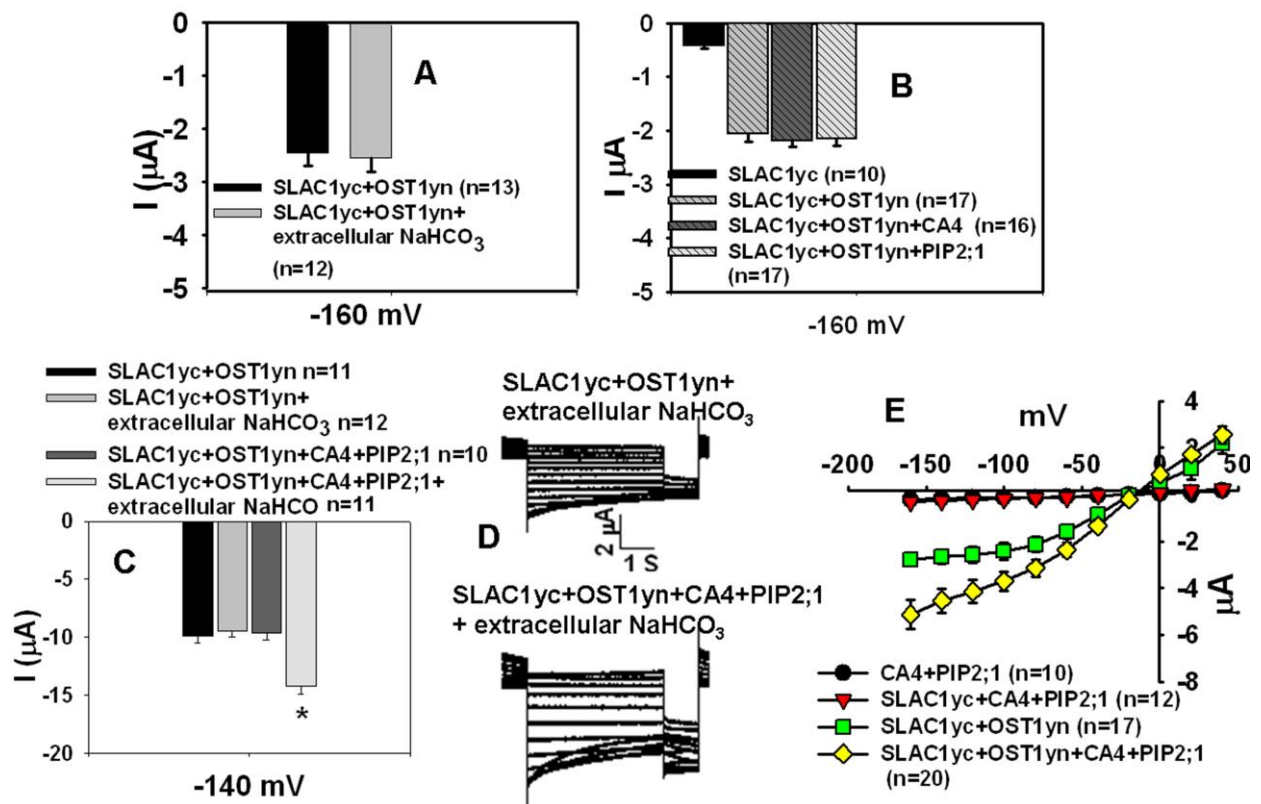

**Figure 4.** Reconstitution of extracellular  $\text{CO}_2/\text{HCO}_3^-$  enhancement of SLAC1-mediated anion channels requires PIP2;1 and  $\beta\text{CA4}$  in *Xenopus* oocytes.

- (A)** Increasing extracellular  $\text{CO}_2/\text{HCO}_3^-$  by addition of 11.5 mM  $\text{NaHCO}_3$  did not enhance in SLAC1yc/OST1yn- expressing oocytes.
- (B)** Either  $\beta\text{CA4}$  or PIP2;1 expressed alone together with SLAC1 and OST1 did not suffice to enhance SLAC1-mediated anion channel currents in *Xenopus* oocytes. Data in (A) and (B) are shown at  $-160$  mV as mean  $\pm$  s.e.m.
- (C)** Co-expression of  $\beta\text{CA4}$  and PIP2;1 with SLAC1yc/OST1yn did not significantly enhance ion currents in the bath solution without high  $\text{CO}_2/\text{HCO}_3^-$ .
- (D)** Whole cell currents were recorded from oocytes co-expressing the indicated cRNAs.  $\beta\text{CA4}$  and PIP2;1 co-expression enhanced SLAC1/OST1-mediated anion channel currents in the presence of 11.5 mM  $\text{NaHCO}_3$  in the bath solution.
- (E)** Steady-state current-voltage relationships from oocytes recorded as in (D). Data are mean  $\pm$  s.e.m. The results were found in at least three independent batches of oocytes.

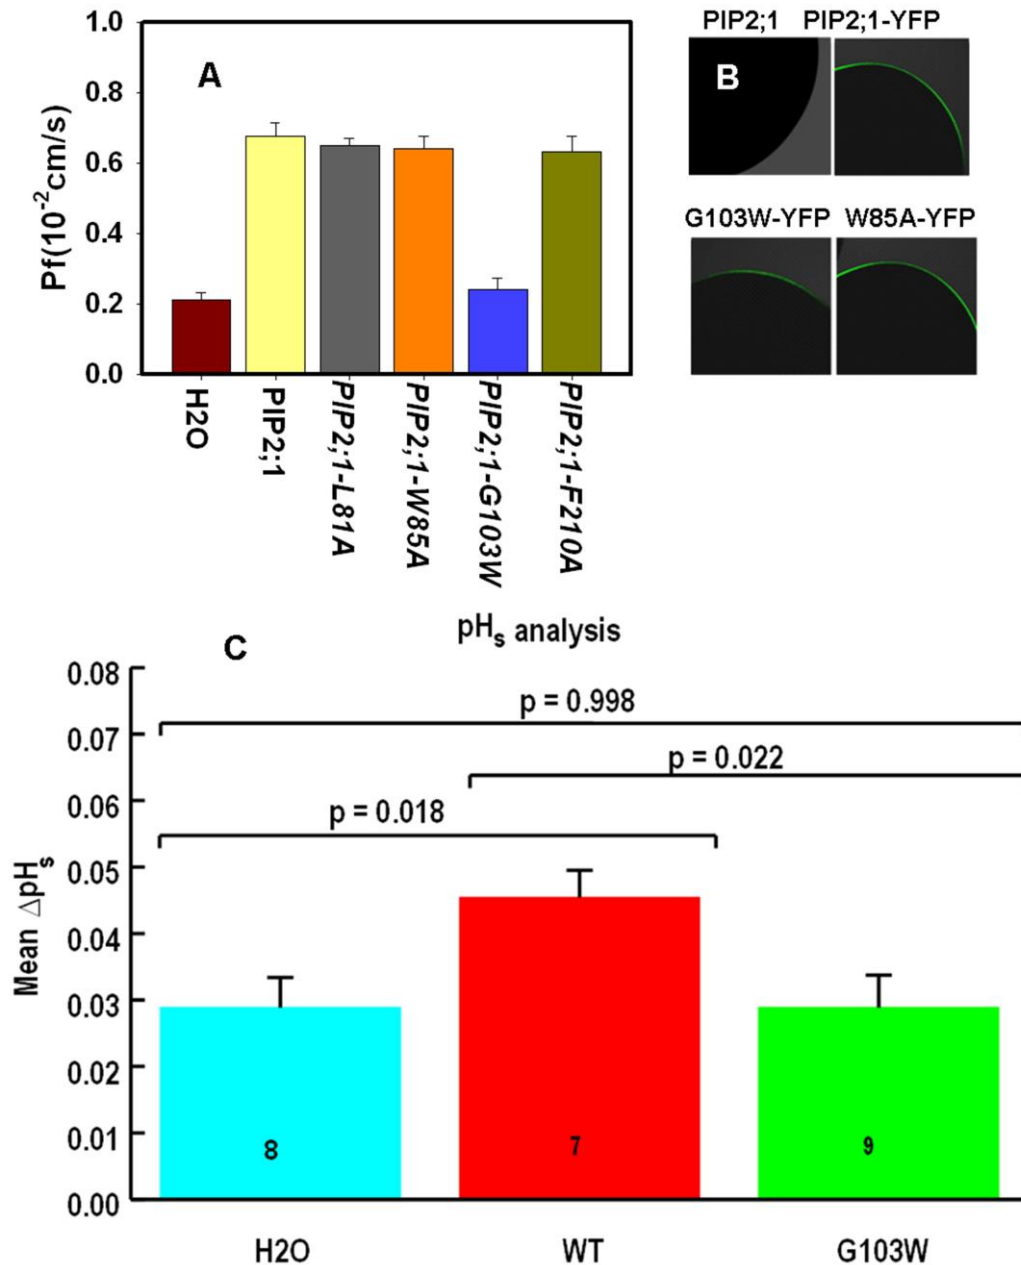

**Figure 5.** Osmotic water permeability coefficient, PIP2;1 location in *Xenopus* oocytes and surface pH analyses.

- (A)** *PIP2;1-G103W*- and non-*PIP2;1*- expressing control oocytes showed a low water permeability. Results are shown as means  $\pm$  s.e.m measurements from five to eight oocytes from one batch of oocytes.
- (B)** *PIP2;1* and its point mutation isoforms as YFP-fusions were present in the vicinity of the oocytes plasma membrane, *PIP2;1* alone served as a negative control.
- (C)** *PIP2;1-G103W* impaired the CO<sub>2</sub> permeability of *PIP2;1* as measured by changes in membrane surface changes in pH (pH<sub>s</sub>).

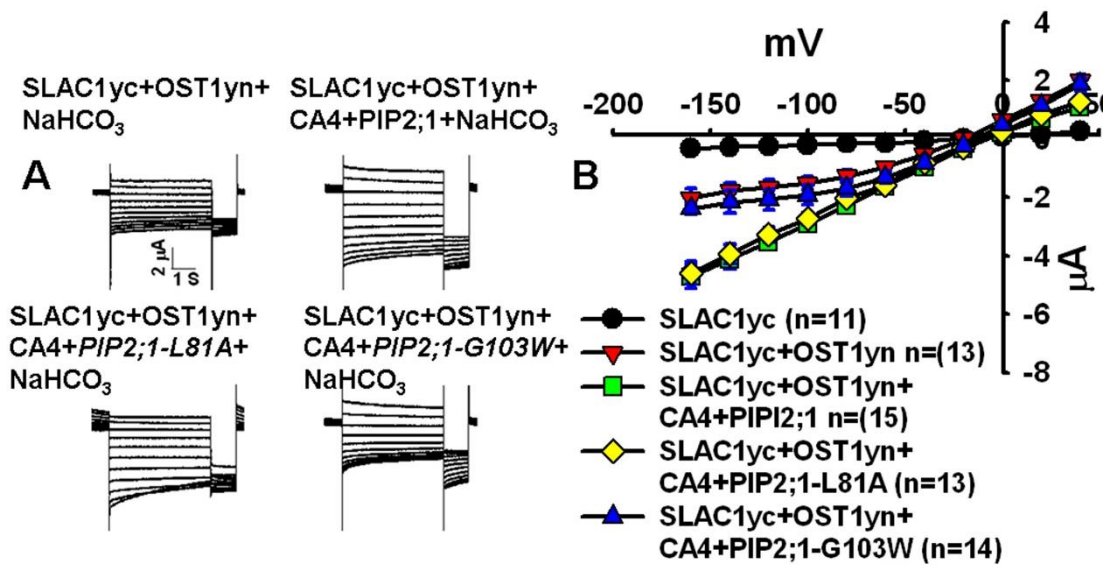

**Figure 6.** The *PIP2;1-G103W* mutant disrupted extracellular  $\text{CO}_2/\text{HCO}_3^-$  induced *PIP2;1- $\beta$ CA4* enhancement of *SLAC1/OST1*-mediated anion channel currents in oocytes.

**(A)** Whole-cell currents were recorded from oocytes expressing the indicated cRNAs with 11.5 mM  $\text{NaHCO}_3$  in the bath solution. The voltage protocol was the same as in Figure 1.

**(B)** Steady-state current-voltage relationships from oocytes recorded as in (A). Data are mean  $\pm$  s.e.m. Results from three independent experiments showed similar results.

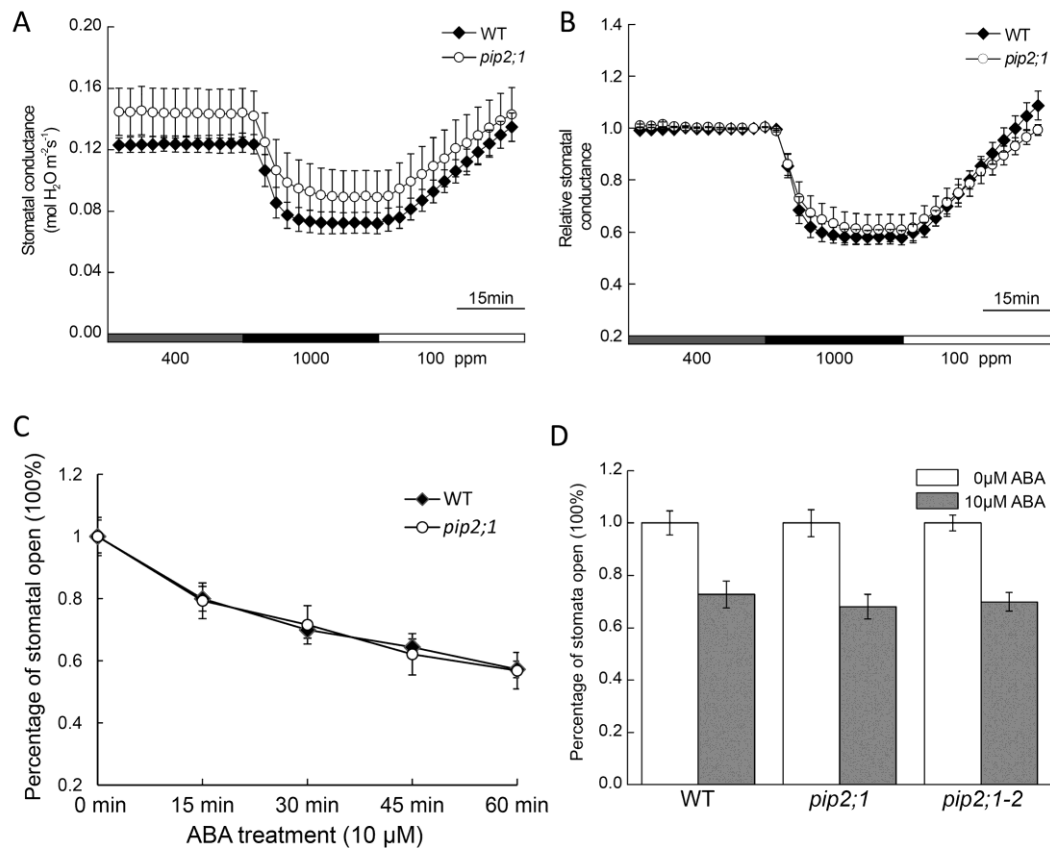

**Figure 7.** *PIP2;1* mutation alone did not significantly impair CO<sub>2</sub>- and ABA- regulation of stomatal movements.

**(A)** Time-resolved intact leaf stomatal conductance in *pip2;1* (CS320492) and wildtype Col (WT) plants with [CO<sub>2</sub>] shifts indicated at the bottom.

**(B)** Relative stomatal conductance data shown in (A).

**(C)** Time-coursed analysis of stomatal movements in response to ABA treatment in individual mapped stomata in wildtype and *pip2;1* mutant. For these analyses individual stomata were imaged and tracked (Xue et al., 2011).

**(D)** Stomatal ABA responses were analyzed in two different *pip2;1* alleles. n = 3 experiments, 30 stomata per experiment and condition, genotype blind. Data are mean ± s.e.m.

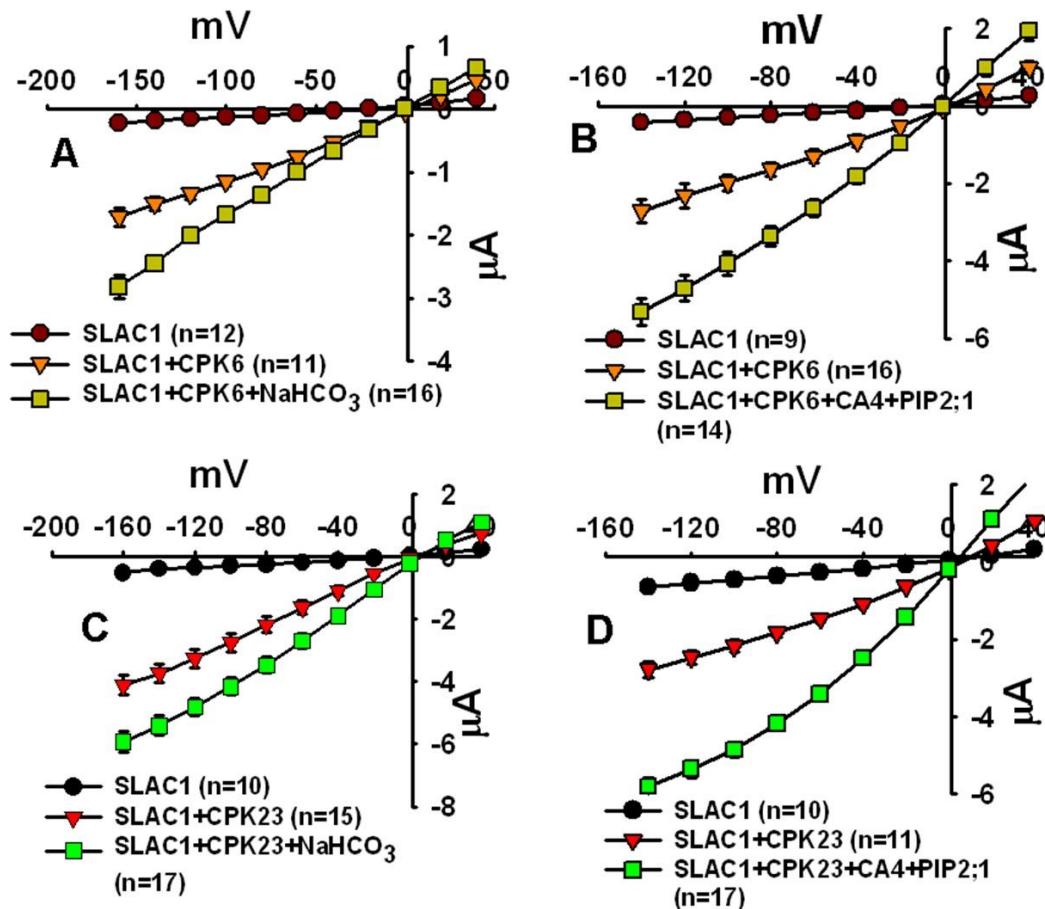

**Figure 8.** Intracellular bicarbonate enhances currents mediated by the SLAC1 anion channel in both CPK6-SLAC1- or CPK23-SLAC1- expressing oocytes and extracellular bicarbonate enhances currents in  $\beta$ CA4, PIP2;1 and CPK6-SLAC1- or CPK23-SLAC1- co-expressing oocytes.

**(A, C)** Bicarbonate injection into oocytes enhances SLAC1 anion channel currents when SLAC1 was co-expressed with the Ca<sup>2+</sup>-dependent protein kinases CPK6 or CPK23 rather than OST1 in oocytes.

**(B, D)**  $\beta$ CA4 and PIP2;1 co-expression with 11.5 mM NaHCO<sub>3</sub> in the bath solution enhances SLAC1/CPK6- and SLAC1/CPK23-mediated anion channel currents. Data are mean  $\pm$  s.e.m. Results from four independent batches of oocytes showed similar results.

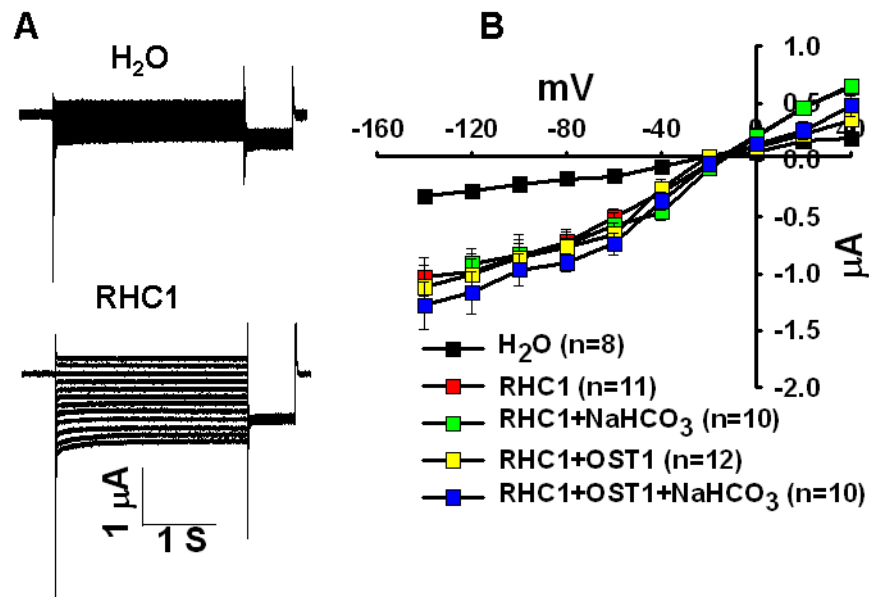

**Figure 9.** RHC1 expression in oocytes causes ionic currents and intracellular bicarbonate did not enhance RHC1-mediated anion channel currents in *Xenopus* oocytes in the presence or absence of the protein kinase OST1.

**(A)** Whole-cell currents were recorded from oocytes expressing the indicated cRNAs.

**(B)** Steady-state current-voltage relationships from oocytes recorded as in (A). Due to overlapping data of “RHC1” and “RHC1+NaHCO<sub>3</sub>” alternating data points are shown. Data are mean  $\pm$  s.e.m. Results from three independent experiments showed similar results.
